# Supplementary material for: Ancestral Regulatory Circuits Governing Ectoderm Patterning Downstream of Nodal and BMP2/4 Revealed by Gene Regulatory Network Analysis in an Echinoderm
Source: PubMed Central journal article supplement (PMC3009687; doi:10.1371/journal.pgen.1001259), 2010-12-23
Supplement: pgen.1001259.s007.pdf [file pgen.1001259.s007.pdf]

Gene knockdown without detectable effect as examined by in situ hybridization

| perturbation    | marker gene | stage    | interaction |
|-----------------|-------------|----------|-------------|
| <b>Mo1 dri</b>  | brachyury   | EG and G | none        |
|                 | chordin     | EG       | none        |
|                 | egip        | G        | none        |
|                 | fgfA        | G        | none        |
|                 | foxA        | EG       | none        |
|                 | foxG        | G        | none        |
|                 | gfi1        | G        | none        |
|                 | goosecoid   | EG and G | none        |
|                 | irxA        | G        | none        |
|                 | nk1         | EG       | none        |
|                 | nk2.2       | EG       | none        |
|                 | oncut       | G        | none        |
|                 | otx         | G        | none        |
|                 | pax2/5/8    | G        | none        |
|                 | tbx2/3      | EG       | none        |
|                 | tubulin     | G        | none        |
| univin          | G           | none     |             |
| wnt8            | G           | none     |             |
| <b>Mo1 FoxG</b> | brachyury   | MB       | none        |
|                 | chordin     | MB       | none        |
|                 | fgfA        | G        | none        |
|                 | foxA        | MB       | none        |
|                 | foxA        | G        | none        |
|                 | goosecoid   | MB       | none        |
|                 | nk2.2       | MB       | none        |
|                 | nodal       | MB       | none        |
|                 | oncut       | G        | none        |
|                 | pax2/5/8    | G        | none        |
|                 | tbx2/3      | MB       | none        |
|                 | univin      | G        | none        |
| wnt8            | G           | none     |             |
| <b>Mo1 Hox7</b> | atbf1       | G        | none        |
|                 | chordin     | G        | none        |
|                 | fgfA        | G        | none        |
|                 | irxA        | G        | none        |
|                 | oncut       | G        | none        |
| <b>Mo1 Msx</b>  | atbf1       | G        | none        |
|                 | brachyury   | MB and G | none        |
|                 | chordin     | MB       | none        |
|                 | dlx         | G        | none        |
|                 | foxA        | MB and G | none        |
| <b>Mo1 Msx</b>  | glypican5   | G        | none        |
|                 | irxA        | G        | none        |
|                 | msx         | G        | none        |
|                 | nk2.2       | MB       | none        |
|                 | nodal       | MB       | none        |
|                 | oncut       | G        | none        |
|                 | pax2/5/8    | G        | none        |
|                 | tbx23       | MB       | none        |
|                 | wnt5        | G        | none        |
|                 | chordin     | G        | none        |
|                 | dri         | G        | none        |
|                 | foxA        | G        | none        |
|                 | goosecoid   | G        | none        |
| nk1             | G           | none     |             |

| perturbation     | marker gene | stage | interaction |
|------------------|-------------|-------|-------------|
| <b>Mo2 Msx</b>   | atbf1       | G     | none        |
|                  | bmp24       | MB    | none        |
|                  | brachyury   | MB    | none        |
|                  | chordin     | MB    | none        |
|                  | dlx         | G     | none        |
|                  | foxA        | MB    | none        |
|                  | irxA        | G     | none        |
|                  | msx         | G     | none        |
|                  | oncut       | G     | none        |
|                  | pax2/5/8    | G     | none        |
|                  | smad6       | MB    | none        |
|                  | smad6       | G     | none        |
|                  | tbx2/3      | MB    | none        |
|                  | tbx23       | G     | none        |
| <b>Mo2 NK2.2</b> | brachyury   | EG    | none        |
|                  | chordin     | EG    | none        |
|                  | foxA        | EG    | none        |
|                  | msx         | EG    | none        |
|                  | oncut       | EG    | none        |
|                  | smad6       | EG    | none        |
| tbx23            | EG          | none  |             |
| <b>Mo1 Oasis</b> | atbf1       | G     | none        |
|                  | chordin     | MB    | none        |
|                  | dlx         | G     | none        |
|                  | irxA        | G     | none        |
|                  | msx         | G     | none        |
|                  | nk2.2       | G     | none        |
|                  | oncut       | G     | none        |
|                  | smad6       | MB    | none        |
|                  | tbx2/3      | MB    | none        |
|                  | wnt5        | G     | none        |
| wnt8             | G           | none  |             |
| <b>Mo1 Wnt5</b>  | atbf1       | G     | none        |
|                  | bmp2/4      | MB    | none        |
|                  | brachyury   | G     | none        |
|                  | chordin     | MB    | none        |
|                  | dlx         | G     | none        |
|                  | dri         | MB    | none        |
|                  | foxA        | G     | none        |
|                  | goosecoid   | MB    | none        |
|                  | irxA        | G     | none        |
|                  | msx         | G     | none        |
|                  | nk2.2       | MB    | none        |
|                  | nodal       | MB    | none        |
|                  | oncut       | G     | none        |
|                  | pax2/5/8    | G     | none        |
| Smad6            | MB          | none  |             |
| tbx2/3           | MB          | none  |             |
| wnt5             | G           | none  |             |
