# Supplementary material for: Ancestral Regulatory Circuits Governing Ectoderm Patterning Downstream of Nodal and BMP2/4 Revealed by Gene Regulatory Network Analysis in an Echinoderm
Source: PLOS journal article supplement (doi:10.1371/journal.pgen.1001259), 2010-12-23
Supplement: S6 (10.1371/journal.pgen.1001259.s006) [file journal.pgen.1001259.s006]

## Interactions deduced from experiments to construct the D/V gene network

| A | Perturbed gene INPUT | Spatial domain (*) INPUT  | ASSAY            | Analyzed gene OUTPUT | Spatial domain (*) OUTPUT                                                                                                                                                                   | Interaction deduced between INPUT and OUTPUT genes | Summary             | Direct interaction ? | Comment                                                                                                                                                             | Additional reference on the interaction ( <i>P. lividus</i> ) |
|---|----------------------|---------------------------|------------------|----------------------|---------------------------------------------------------------------------------------------------------------------------------------------------------------------------------------------|----------------------------------------------------|---------------------|----------------------|---------------------------------------------------------------------------------------------------------------------------------------------------------------------|---------------------------------------------------------------|
|   | SoxB1                | Whole ectoderm            | Loss of function | bmp1                 | Ventral ectoderm + Ciliary band (G, Pr)                                                                                                                                                     | Activation                                         | SoxB1 -> bmp1       | Unknown              |                                                                                                                                                                     |                                                               |
|   | SoxB1                | Whole ectoderm            | Loss of function | chordin              | ventral ectoderm (SB->G)                                                                                                                                                                    | Activation                                         | SoxB1 -> chordin    | Unknown              |                                                                                                                                                                     |                                                               |
|   | SoxB1                | Whole ectoderm            | Loss of function | deadringer           | Ventral ectoderm + Ciliary band (G, Pr)                                                                                                                                                     | Activation                                         | SoxB1 -> deadringer | Unknown              |                                                                                                                                                                     |                                                               |
|   | SoxB1                | Whole ectoderm            | Loss of function | egip                 | Ciliary band + Dorsal ectoderm (strong at the apex, weaker elsewhere) (LG, Pr)                                                                                                              | Activation                                         | SoxB1 -> egip       | Unknown              |                                                                                                                                                                     |                                                               |
|   | SoxB1                | Whole ectoderm            | Loss of function | FGFA                 | Whole ectoderm early, then inhibited dorsally before being restricted to the ciliary band (MB, G, Pr)                                                                                       | Activation                                         | SoxB1 -> FGFA       | Unknown              |                                                                                                                                                                     |                                                               |
|   | SoxB1                | Whole ectoderm            | Loss of function | foxG                 | Ventral ectoderm + border with ciliary band - stomodeum (MB, G), then restricted to the ciliary band only (LG/Pr)                                                                           | Activation                                         | SoxB1 -> foxG       | Unknown              |                                                                                                                                                                     |                                                               |
|   | SoxB1                | Whole ectoderm            | Loss of function | gfi1                 | Ciliary band (lateMB, G, Pr)                                                                                                                                                                | Activation                                         | SoxB1 -> gfi1       | Unknown              |                                                                                                                                                                     |                                                               |
|   | SoxB1                | Whole ectoderm            | Loss of function | glypican5            | Dorsal ectoderm (MB, G, Pr)                                                                                                                                                                 | Activation                                         | SoxB1 -> glypican5  | Unknown              |                                                                                                                                                                     |                                                               |
|   | SoxB1                | Whole ectoderm            | Loss of function | onecut               | Whole ectoderm early (blastula), then restricted to the ciliary band (late MB -> Pr)                                                                                                        | Activation                                         | SoxB1 -> onecut     | Unknown              |                                                                                                                                                                     |                                                               |
|   | SoxB1                | Whole ectoderm            | Loss of function | otx                  | Whole ectoderm early, inhibited in the dorsal most ectoderm (late MB -> Pr), inhibited later in central ventral ectoderm (presumptive stomodeum, LG and Pr stages)                          | Repression                                         | SoxB1 -> otx        | Unknown              |                                                                                                                                                                     |                                                               |
|   | SoxB1                | Whole ectoderm            | Loss of function | pax2/5/8             | Ciliary band (vegetal part) (G)                                                                                                                                                             | Activation                                         | SoxB1 -> pax2/5/8   | Unknown              |                                                                                                                                                                     |                                                               |
|   | SoxB1                | Whole ectoderm            | Loss of function | univin               | Whole ectoderm early, then inhibited dorsally (MB) before being restricted to the lateral part of the ciliary band (G, Pr). At G stage, a weak expression persists in the ventral ectoderm. | Activation                                         | SoxB1 -> univin     | Unknown              |                                                                                                                                                                     | Range and Lapraz et al., 2008                                 |
|   | SoxB1                | Whole ectoderm            | Loss of function | wnt8                 | ventral ectoderm + lateral ectoderm (MB), then restricted to the ciliary band (G, Pr)                                                                                                       | Activation                                         | SoxB1 -> wnt8       | Unknown              |                                                                                                                                                                     |                                                               |
|   | Nodal                | Ventral ectoderm (64C->G) | Gain of function | 29D                  | dorsal ectoderm (Pr)                                                                                                                                                                        | Inhibition                                         | Nodal -> 29D        | Unknown              |                                                                                                                                                                     | Duboc et al, 2004                                             |
|   | Nodal                | Ventral ectoderm (64C->G) | Gain of function | admp2                | Lower dorsal ectoderm (MB, G)                                                                                                                                                               | Inhibition                                         | Nodal -> admp2      | Unknown              |                                                                                                                                                                     |                                                               |
|   | Nodal                | Ventral ectoderm (64C->G) | Gain of function | atbf1                | Lower ventral + dorsal ectoderm (G)                                                                                                                                                         | Inhibition                                         | Nodal -> atbf1      | Unknown              |                                                                                                                                                                     |                                                               |
|   | Nodal                | Ventral ectoderm (64C->G) | Gain of function | bmp1                 | Ventral ectoderm + Ciliary band (G, Pr)                                                                                                                                                     | Activation                                         | Nodal -> bmp1       | Unknown              |                                                                                                                                                                     |                                                               |
|   | Nodal                | Ventral ectoderm (64C->G) | Gain of function | bmp2/4               | ventral ectoderm (EB->G)                                                                                                                                                                    | Activation                                         | Nodal -> bmp2/4     | Unknown              |                                                                                                                                                                     |                                                               |
|   | Nodal                | Ventral ectoderm (64C->G) | Gain of function | brachyury            | ventral ectoderm, then stomodeum                                                                                                                                                            | Activation                                         | Nodal -> brachyury  | Unknown              |                                                                                                                                                                     | Duboc et al, 2004                                             |
|   | Nodal                | Ventral ectoderm (64C->G) | Gain of function | chordin              | ventral ectoderm (SB->G)                                                                                                                                                                    | Activation                                         | Nodal -> chordin    | Unknown              |                                                                                                                                                                     | Lapraz et al, 2009                                            |
|   | Nodal                | Ventral ectoderm (64C->G) | Gain of function | deadringer           | Ventral ectoderm + Ciliary band (G, Pr)                                                                                                                                                     | Activation                                         | Nodal -> deadringer | Unknown              |                                                                                                                                                                     |                                                               |
|   | Nodal                | Ventral ectoderm (64C->G) | Gain of function | delta                | Neuron precursor (Pr)                                                                                                                                                                       | Inhibition                                         | Nodal -> delta      | Unknown              |                                                                                                                                                                     |                                                               |
|   | Nodal                | Ventral ectoderm (64C->G) | Gain of function | dlx                  | dorsal ectoderm (MB, G)                                                                                                                                                                     | Inhibition                                         | Nodal -> dlx        | Unknown              |                                                                                                                                                                     |                                                               |
|   | Nodal                | Ventral ectoderm (64C->G) | Gain of function | egip                 | Ciliary band + Dorsal ectoderm (strong at the apex, weaker elsewhere) (LG, Pr)                                                                                                              | Inhibition                                         | Nodal -> egip       | Unknown              |                                                                                                                                                                     |                                                               |
|   | Nodal                | Ventral ectoderm (64C->G) | Gain of function | fgfA                 | Whole ectoderm early, then inhibited dorsally before being restricted to the ciliary band (MB, G, Pr)                                                                                       | Inhibition                                         | Nodal -> fgfA       | Unknown              |                                                                                                                                                                     | Röttinger et al, 2008                                         |
|   | Nodal                | Ventral ectoderm (64C->G) | Gain of function | fgfr1                | apical + ventral ectoderm (SB->G)                                                                                                                                                           | Activation                                         | Nodal -> fgfr1      | Unknown              |                                                                                                                                                                     |                                                               |
|   | Nodal                | Ventral ectoderm (64C->G) | Gain of function | foxA                 | ventral ectoderm, then stomodeum (MB->Pr)                                                                                                                                                   | Activation                                         | Nodal -> foxA       | Unknown              |                                                                                                                                                                     |                                                               |
|   | Nodal                | Ventral ectoderm (64C->G) | Gain of function | foxG                 | Ventral ectoderm + border with ciliary band - stomodeum (MB, G), then restricted to the ciliary band only (LG/Pr)                                                                           | Activation + Inhibition                            | Nodal -> foxG       | Unknown              | induction of ectopic expression in a belt of cells in the animal and vegetal ectoderm inhibition in median territory (presumably corresponding to future stomodeum) |                                                               |
|   | Nodal                | Ventral ectoderm (64C->G) | Gain of function | foxQ2                | whole ectoderm early, then restricted to apical domain (B, MB, G)                                                                                                                           | Independent                                        | N/A                 | N/A                  |                                                                                                                                                                     |                                                               |

| A | Perturbed gene INPUT | Spatial domain (*) INPUT                    | ASSAY            | Analyzed gene OUTPUT | Spatial domain (*) OUTPUT                                                                                                                                                                   | Interaction deduced between INPUT and OUTPUT genes | Summary              | Direct interaction ? | Comment                                                                                                                                                                                                                                                                                                                                   | Additional reference on the interaction ( <i>P. lividus</i> ) |
|---|----------------------|---------------------------------------------|------------------|----------------------|---------------------------------------------------------------------------------------------------------------------------------------------------------------------------------------------|----------------------------------------------------|----------------------|----------------------|-------------------------------------------------------------------------------------------------------------------------------------------------------------------------------------------------------------------------------------------------------------------------------------------------------------------------------------------|---------------------------------------------------------------|
|   | Nodal                | Ventral ectoderm (64C->G)                   | Gain of function | gfi1                 | Ciliary band (lateMB, G, Pr)                                                                                                                                                                | Inhibition                                         | Nodal -> gfi1        | Unknown              |                                                                                                                                                                                                                                                                                                                                           |                                                               |
|   | Nodal                | Ventral ectoderm (64C->G)                   | Gain of function | goosecoid            | ventral ectoderm (B, MB), then in a ring around the stomodeum (G)                                                                                                                           | Activation                                         | Nodal -> goosecoid   | Unknown              |                                                                                                                                                                                                                                                                                                                                           | Duboc et al, 2004                                             |
|   | Nodal                | Ventral ectoderm (64C->G)                   | Gain of function | hox7                 | dorsal ectoderm (MB, G, Pr)                                                                                                                                                                 | Inhibition                                         | Nodal -> hox7        | Unknown              |                                                                                                                                                                                                                                                                                                                                           |                                                               |
|   | Nodal                | Ventral ectoderm (64C->G)                   | Gain of function | irxA                 | Dorsal ectoderm (MB), then upper dorsal ectoderm + stomodeum (G)                                                                                                                            | Activation + Inhibition                            | Nodal -> irxA        | Unknown              | activation : extension of stomodeal territory, inhibition of dorsal expression                                                                                                                                                                                                                                                            |                                                               |
|   | Nodal                | Ventral ectoderm (64C->G)                   | Gain of function | lefty                | ventral ectoderm (from early blastula to G)                                                                                                                                                 | Activation                                         | Nodal -> lefty       | Unknown              |                                                                                                                                                                                                                                                                                                                                           | Duboc et al, 2004                                             |
|   | Nodal                | Ventral ectoderm (64C->G)                   | Gain of function | msx                  | Dorsal ectoderm (MB), then restricted to lower dorsal ectoderm (G)                                                                                                                          | Inhibition                                         | Nodal -> msx         | Unknown              |                                                                                                                                                                                                                                                                                                                                           |                                                               |
|   | Nodal                | Ventral ectoderm (64C->G)                   | Gain of function | nk1                  | ventral ectoderm (lower half/vegetal)                                                                                                                                                       | Activation                                         | Nodal -> nk1         | Unknown              |                                                                                                                                                                                                                                                                                                                                           |                                                               |
|   | Nodal                | Ventral ectoderm (64C->G)                   | Gain of function | nk2.2                | Lower ventral + dorsal ectoderm (LB -> G)                                                                                                                                                   | Activation                                         | Nodal -> nk2.2       | Unknown              |                                                                                                                                                                                                                                                                                                                                           |                                                               |
|   | Nodal                | Ventral ectoderm (64C->G)                   | Gain of function | onecut               | Whole ectoderm early (blastula), then restricted to the ciliary band (late MB -> Pr)                                                                                                        | Inhibition                                         | Nodal -> onecut      | Unknown              |                                                                                                                                                                                                                                                                                                                                           |                                                               |
|   | Nodal                | Ventral ectoderm (64C->G)                   | Gain of function | otx                  | Whole ectoderm early, inhibited in the dorsal most ectoderm (late MB -> Pr), inhibited later in central ventral ectoderm (presumptive stomodeum, LG and Pr stages)                          | Inhibition                                         | Nodal -> otx         | Unknown              | at LG stage, Nodal overexpression (high concentration) inhibits Otx expression in a large median ectoderm band that corresponds to the radialized stomodeal territory of these embryos                                                                                                                                                    |                                                               |
|   | Nodal                | Ventral ectoderm (64C->G)                   | Gain of function | pax2/5/8             | Ciliary band (vegetal part) (G)                                                                                                                                                             | Inhibition                                         | Nodal -> pax2/5/8    | Unknown              |                                                                                                                                                                                                                                                                                                                                           | Röttinger et al, 2008                                         |
|   | Nodal                | Ventral ectoderm (64C->G)                   | Gain of function | smad6                | Dorsal ectoderm (MB->G)                                                                                                                                                                     | Inhibition                                         | Nodal -> smad6       | Unknown              |                                                                                                                                                                                                                                                                                                                                           |                                                               |
|   | Nodal                | Ventral ectoderm (64C->G)                   | Gain of function | tbx2/3               | Dorsal ectoderm (LB->G)                                                                                                                                                                     | Inhibition                                         | Nodal -> tbx2/3      | Unknown              |                                                                                                                                                                                                                                                                                                                                           | Duboc et al, 2004                                             |
|   | Nodal                | Ventral ectoderm (64C->G)                   | Gain of function | tubulin              | ciliary band (LG and Pr). A weaker expression is present at the dorsal ectoderm apex                                                                                                        | Inhibition                                         | Nodal -> tubulin     | Unknown              |                                                                                                                                                                                                                                                                                                                                           |                                                               |
|   | Nodal                | Ventral ectoderm (64C->G)                   | Gain of function | unc4                 | Dorsal apex (LG, Pr)                                                                                                                                                                        | Inhibition                                         | Nodal -> unc4        | Unknown              |                                                                                                                                                                                                                                                                                                                                           |                                                               |
|   | Nodal                | Ventral ectoderm (64C->G)                   | Gain of function | univin               | Whole ectoderm early, then inhibited dorsally (MB) before being restricted to the lateral part of the ciliary band (G, Pr). At G stage, a weak expression persists in the ventral ectoderm. | Activation + Inhibition                            | Nodal -> univin      | Unknown              | univin is faintly expressed in the ectoderm in embryos overexpressing nodal at LG stage. This level of expression is compatible with univin weak expression in the ventral ectoderm of control embryos at the same stage. Strong levels of expression found in the ciliary band of control embryos are abolished by nodal overexpression. |                                                               |
|   | Nodal                | Ventral ectoderm (64C->G)                   | Gain of function | wnt5                 | Lower dorsal ectoderm (MB, G)                                                                                                                                                               | Inhibition                                         | Nodal -> wnt5        | Unknown              |                                                                                                                                                                                                                                                                                                                                           |                                                               |
|   | Nodal                | Ventral ectoderm (64C->G)                   | Gain of function | wnt8                 | ventral ectoderm + lateral ectoderm (MB), then restricted to the ciliary band (G, Pr)                                                                                                       | Inhibition                                         | Nodal -> wnt8        | Unknown              |                                                                                                                                                                                                                                                                                                                                           |                                                               |
|   | Lefty                | ventral ectoderm (from early blastula to G) | Loss of function | tubulin              | ciliary band (LG and Pr). A weaker expression is present at the dorsal ectoderm apex                                                                                                        | Inhibition                                         | Lefty -> tubulin     | Unknown              | Lefty is a Nodal antagonist : in Lefty morphants, Nodal is ectopically expressed in the whole ectoderm                                                                                                                                                                                                                                    | Duboc et al, 2008                                             |
|   | Bmp2/4               | ventral ectoderm (EB->G)                    | Gain of function | 29D                  | dorsal ectoderm (Pr)                                                                                                                                                                        | Activation                                         | Bmp2/4 -> 29D        | Unknown              |                                                                                                                                                                                                                                                                                                                                           | Duboc et al, 2004                                             |
|   | Bmp2/4               | ventral ectoderm (EB->G)                    | Gain of function | admp2                | Lower dorsal ectoderm (MB, G)                                                                                                                                                               | Activation                                         | Bmp2/4 -> admp2      | Unknown              |                                                                                                                                                                                                                                                                                                                                           |                                                               |
|   | Bmp2/4               | ventral ectoderm (EB->G)                    | Gain of function | atbf1                | Lower ventral + dorsal ectoderm (G)                                                                                                                                                         | Activation                                         | Bmp2/4 -> atbf1      | Unknown              |                                                                                                                                                                                                                                                                                                                                           |                                                               |
|   | Bmp2/4               | ventral ectoderm (EB->G)                    | Gain of function | bmp1                 | Ventral ectoderm + Ciliary band (G, Pr)                                                                                                                                                     | Inhibition                                         | Bmp2/4 -> bmp1       | Unknown              |                                                                                                                                                                                                                                                                                                                                           |                                                               |
|   | Bmp2/4               | ventral ectoderm (EB->G)                    | Gain of function | bmp2/4               | ventral ectoderm (EB->G)                                                                                                                                                                    | Inhibition                                         | Bmp2/4 -> bmp2/4     | Unknown              |                                                                                                                                                                                                                                                                                                                                           |                                                               |
|   | Bmp2/4               | ventral ectoderm (EB->G)                    | Gain of function | brachyury            | ventral ectoderm, then stomodeum                                                                                                                                                            | Inhibition                                         | Bmp2/4 -> brachyury  | Unknown              |                                                                                                                                                                                                                                                                                                                                           | Duboc et al, 2004                                             |
|   | Bmp2/4               | ventral ectoderm (EB->G)                    | Gain of function | chordin              | ventral ectoderm (SB->G)                                                                                                                                                                    | Inhibition                                         | Bmp2/4 -> chordin    | Unknown              |                                                                                                                                                                                                                                                                                                                                           |                                                               |
|   | Bmp2/4               | ventral ectoderm (EB->G)                    | Gain of function | deadringer           | Ventral ectoderm + Ciliary band (G, Pr)                                                                                                                                                     | Inhibition                                         | Bmp2/4 -> deadringer | Unknown              |                                                                                                                                                                                                                                                                                                                                           |                                                               |
|   | Bmp2/4               | ventral ectoderm (EB->G)                    | Gain of function | dlx                  | dorsal ectoderm (MB, G)                                                                                                                                                                     | Activation                                         | Bmp2/4 -> dlx        | Unknown              |                                                                                                                                                                                                                                                                                                                                           |                                                               |
|   | Bmp2/4               | ventral ectoderm (EB->G)                    | Gain of function | egip                 | Ciliary band + Dorsal ectoderm (strong at the apex, weaker elsewhere) (LG, Pr)                                                                                                              | Activation + Inhibition                            | Bmp2/4 -> egip       | Unknown              | lower dorsal expression (dorsal apex) is extended radially, while the strong ciliary band expression is inhibited if BMP2/4 is overactivated                                                                                                                                                                                              |                                                               |
|   | Bmp2/4               | ventral ectoderm (EB->G)                    | Gain of function | fgfA                 | Whole ectoderm early, then inhibited dorsally before being restricted to the ciliary band (MB, G, Pr)                                                                                       | Inhibition                                         | Bmp2/4 -> fgfA       | Unknown              |                                                                                                                                                                                                                                                                                                                                           |                                                               |
|   | Bmp2/4               | ventral ectoderm (EB->G)                    | Gain of function | foxA                 | ventral ectoderm, then stomodeum (MB->Pr)                                                                                                                                                   | Inhibition                                         | Bmp2/4 -> foxA       | Unknown              |                                                                                                                                                                                                                                                                                                                                           |                                                               |

| A | Perturbed gene INPUT         | Spatial domain (*) INPUT  | ASSAY                                       | Analyzed gene OUTPUT | Spatial domain (*) OUTPUT                                                                                                                                                                   | Interaction deduced between INPUT and OUTPUT genes | Summary                                | Direct interaction ? | Comment                                                                                                                           | Additional reference on the interaction ( <i>P. lividus</i> ) |
|---|------------------------------|---------------------------|---------------------------------------------|----------------------|---------------------------------------------------------------------------------------------------------------------------------------------------------------------------------------------|----------------------------------------------------|----------------------------------------|----------------------|-----------------------------------------------------------------------------------------------------------------------------------|---------------------------------------------------------------|
|   | Bmp2/4                       | ventral ectoderm (EB->G)  | Gain of function                            | foxG                 | Ventral ectoderm + border with ciliary band - stomodeum (MB, G), then restricted to the ciliary band only (LG/Pr)                                                                           | Inhibition                                         | Bmp2/4 -> foxG                         | Unknown              |                                                                                                                                   |                                                               |
|   | Bmp2/4                       | ventral ectoderm (EB->G)  | Gain of function                            | foxQ2                | whole ectoderm early, then restricted to apical domain (B, MB, G)                                                                                                                           | Inhibition                                         | Bmp2/4 -> foxQ2                        | Unknown              |                                                                                                                                   |                                                               |
|   | Bmp2/4                       | ventral ectoderm (EB->G)  | Gain of function                            | gfi1                 | Ciliary band (lateMB, G, Pr)                                                                                                                                                                | Inhibition                                         | Bmp2/4 -> gfi1                         | Unknown              |                                                                                                                                   |                                                               |
|   | Bmp2/4                       | ventral ectoderm (EB->G)  | Gain of function                            | goosecoid            | ventral ectoderm (B, MB), then in a ring around the stomodeum (G)                                                                                                                           | Inhibition                                         | Bmp2/4 -> goosecoid                    | Unknown              |                                                                                                                                   | Duboc et al, 2004                                             |
|   | Bmp2/4                       | ventral ectoderm (EB->G)  | Gain of function                            | hox7                 | dorsal ectoderm (MB, G, Pr)                                                                                                                                                                 | Activation                                         | Bmp2/4 -> hox7                         | Unknown              |                                                                                                                                   |                                                               |
|   | Bmp2/4                       | ventral ectoderm (EB->G)  | Gain of function                            | id                   | dorsal ectoderm (transient, MB)                                                                                                                                                             | Activation                                         | Bmp2/4 -> id                           | Unknown              |                                                                                                                                   |                                                               |
|   | Bmp2/4                       | ventral ectoderm (EB->G)  | Gain of function                            | irxA                 | Dorsal ectoderm (MB), then upper dorsal ectoderm + stomodeum (G)                                                                                                                            | Activation                                         | Bmp2/4 -> irxA                         | Unknown              |                                                                                                                                   |                                                               |
|   | Bmp2/4                       | ventral ectoderm (EB->G)  | Gain of function                            | msx                  | Dorsal ectoderm (MB), then restricted to lower dorsal ectoderm (G)                                                                                                                          | Activation                                         | Bmp2/4 -> msx                          | Unknown              |                                                                                                                                   |                                                               |
|   | Bmp2/4                       | ventral ectoderm (EB->G)  | Gain of function                            | nk1                  | ventral ectoderm (lower half/vegetal)                                                                                                                                                       | Inhibition                                         | Bmp2/4 -> nk1                          | Unknown              |                                                                                                                                   |                                                               |
|   | Bmp2/4                       | ventral ectoderm (EB->G)  | Gain of function                            | nk2.2                | Lower ventral + dorsal ectoderm (LB -> G)                                                                                                                                                   | Activation                                         | Bmp2/4 -> nk2.2                        | Unknown              |                                                                                                                                   |                                                               |
|   | Bmp2/4                       | ventral ectoderm (EB->G)  | Gain of function                            | nodal                | Ventral ectoderm (64C->G)                                                                                                                                                                   | Inhibition                                         | Bmp2/4 -> nodal                        | Unknown              |                                                                                                                                   | Duboc et al, 2004                                             |
|   | Bmp2/4                       | ventral ectoderm (EB->G)  | Gain of function                            | oasis                | dorsal ectoderm (MB, G)                                                                                                                                                                     | Activation                                         | Bmp2/4 -> oasis                        | Unknown              |                                                                                                                                   |                                                               |
|   | Bmp2/4                       | ventral ectoderm (EB->G)  | Gain of function                            | onecut               | Whole ectoderm early (blastula), then restricted to the ciliary band (late MB -> Pr)                                                                                                        | Inhibition                                         | Bmp2/4 -> onecut                       | Unknown              |                                                                                                                                   |                                                               |
|   | Bmp2/4                       | ventral ectoderm (EB->G)  | Gain of function                            | otx                  | Whole ectoderm early, inhibited in the dorsal most ectoderm (late MB -> Pr), inhibited later in central ventral ectoderm (presumptive stomodeum, LG and Pr stages)                          | Inhibition                                         | Bmp2/4 -> otx                          | Unknown              |                                                                                                                                   |                                                               |
|   | Bmp2/4                       | ventral ectoderm (EB->G)  | Gain of function                            | pax2/5/8             | Ciliary band (vegetal part) (G)                                                                                                                                                             | Inhibition                                         | Bmp2/4 -> pax2/5/8                     | Unknown              |                                                                                                                                   |                                                               |
|   | Bmp2/4                       | ventral ectoderm (EB->G)  | Gain of function                            | smad6                | Dorsal ectoderm (MB->G)                                                                                                                                                                     | Activation                                         | Bmp2/4 -> smad6                        | Unknown              |                                                                                                                                   |                                                               |
|   | Bmp2/4                       | ventral ectoderm (EB->G)  | Gain of function                            | tbx2/3               | Dorsal ectoderm (LB->G)                                                                                                                                                                     | Activation                                         | Bmp2/4 -> tbx2/3                       | Unknown              |                                                                                                                                   | Duboc et al, 2004                                             |
|   | Bmp2/4                       | ventral ectoderm (EB->G)  | Gain of function                            | tubulin              | ciliary band (LG and Pr). A weaker expression is present at the dorsal ectoderm apex                                                                                                        | Activation + Inhibition                            | Bmp2/4 -> tubulin                      | Unknown              | most expression is abolished except a vegetal ring that corresponds to the radialization of the dorsal-most expression of tubulin |                                                               |
|   | Bmp2/4                       | ventral ectoderm (EB->G)  | Gain of function                            | unc4                 | Dorsal apex (LG, Pr)                                                                                                                                                                        | Activation                                         | Bmp2/4 -> unc4                         | Unknown              |                                                                                                                                   |                                                               |
|   | Bmp2/4                       | ventral ectoderm (EB->G)  | Gain of function                            | univin               | Whole ectoderm early, then inhibited dorsally (MB) before being restricted to the lateral part of the ciliary band (G, Pr). At G stage, a weak expression persists in the ventral ectoderm. | Inhibition                                         | Bmp2/4 -> univin                       | Unknown              |                                                                                                                                   |                                                               |
|   | Bmp2/4                       | ventral ectoderm (EB->G)  | Gain of function                            | wnt5                 | Lower dorsal ectoderm (MB, G)                                                                                                                                                               | Activation                                         | Bmp2/4 -> wnt5                         | Unknown              |                                                                                                                                   |                                                               |
|   | Bmp2/4                       | ventral ectoderm (EB->G)  | Gain of function                            | wnt8                 | ventral ectoderm + lateral ectoderm (MB), then restricted to the ciliary band (G, Pr)                                                                                                       | Inhibition                                         | Bmp2/4 -> wnt8                         | Unknown              |                                                                                                                                   |                                                               |
|   | Alk3/6 (BMP type I receptor) | Ubiquitous                | Gain of function                            | onecut               | Whole ectoderm early (blastula), then restricted to the ciliary band (late MB -> Pr)                                                                                                        | Inhibition                                         | Alk3/6 (BMP type I receptor) -> onecut | Unknown              | An activated form of the ALK3/6 receptor is used                                                                                  |                                                               |
|   | Nodal                        | Ventral ectoderm (64C->G) | Gain of function+/- translational inhibitor | bmp2/4               | ventral ectoderm (EB->G)                                                                                                                                                                    | Activation                                         | Nodal -> bmp2/4                        | Yes                  |                                                                                                                                   |                                                               |
|   | Nodal                        | Ventral ectoderm (64C->G) | Gain of function+/- translational inhibitor | brachyury            | ventral ectoderm, then stomodeum                                                                                                                                                            | Activation                                         | Nodal -> brachyury                     | No                   |                                                                                                                                   |                                                               |
|   | Nodal                        | Ventral ectoderm (64C->G) | Gain of function+/- translational inhibitor | chordin              | ventral ectoderm (SB->G)                                                                                                                                                                    | Activation                                         | Nodal -> chordin                       | Yes                  |                                                                                                                                   |                                                               |
|   | Nodal                        | Ventral ectoderm (64C->G) | Gain of function+/- translational inhibitor | deadringer           | Ventral ectoderm + Ciliary band (G, Pr)                                                                                                                                                     | N/A                                                | N/A                                    | N/A                  | no response to short treatment with Nodal protein                                                                                 |                                                               |

| A | Perturbed gene INPUT | Spatial domain (*) INPUT  | ASSAY                                       | Analyzed gene OUTPUT | Spatial domain (*) OUTPUT                                                                                         | Interaction deduced between INPUT and OUTPUT genes | Summary            | Direct interaction ? | Comment                                           | Additional reference on the interaction ( <i>P. lividus</i> ) |
|---|----------------------|---------------------------|---------------------------------------------|----------------------|-------------------------------------------------------------------------------------------------------------------|----------------------------------------------------|--------------------|----------------------|---------------------------------------------------|---------------------------------------------------------------|
|   | Nodal                | Ventral ectoderm (64C->G) | Gain of function+/- translational inhibitor | FGFR1                | apical + ventral ectoderm (SB->G)                                                                                 | Activation                                         | Nodal -> FGFR1     | Yes                  |                                                   |                                                               |
|   | Nodal                | Ventral ectoderm (64C->G) | Gain of function+/- translational inhibitor | foxA                 | ventral ectoderm, then stomodeum (MB->Pr)                                                                         | N/A                                                | N/A                | N/A                  | no response to short treatment with Nodal protein |                                                               |
|   | Nodal                | Ventral ectoderm (64C->G) | Gain of function+/- translational inhibitor | foxG                 | Ventral ectoderm + border with ciliary band - stomodeum (MB, G), then restricted to the ciliary band only (LG/Pr) | N/A                                                | N/A                | N/A                  | no response to short treatment with Nodal protein |                                                               |
|   | Nodal                | Ventral ectoderm (64C->G) | Gain of function+/- translational inhibitor | goosecoid            | ventral ectoderm (B, MB), then in a ring around the stomodeum (G)                                                 | Activation                                         | Nodal -> goosecoid | Yes                  |                                                   |                                                               |
|   | Nodal                | Ventral ectoderm (64C->G) | Gain of function+/- translational inhibitor | lefty                | ventral ectoderm (from early blastula to G)                                                                       | Activation                                         | Nodal -> lefty     | Yes                  |                                                   |                                                               |
|   | Nodal                | Ventral ectoderm (64C->G) | Gain of function+/- translational inhibitor | nk1                  | ventral ectoderm (lower half/vegetal)                                                                             | N/A                                                | N/A                | N/A                  | no response to short treatment with Nodal protein |                                                               |
|   | Nodal                | Ventral ectoderm (64C->G) | Gain of function+/- translational inhibitor | nk2.2                | Lower ventral + dorsal ectoderm (LB -> G)                                                                         | Activation                                         | Nodal -> nk2.2     | Yes                  |                                                   |                                                               |
|   | Nodal                | Ventral ectoderm (64C->G) | Gain of function+/- translational inhibitor | nodal                | Ventral ectoderm (64C->G)                                                                                         | Activation                                         | Nodal -> nodal     | Yes                  | supported by promoter analysis                    |                                                               |
|   | Nodal                | Ventral ectoderm (64C->G) | Gain of function+/- translational inhibitor | tbx2/3               | Dorsal ectoderm (LB->G)                                                                                           | N/A                                                | N/A                | N/A                  | no response to short treatment with Nodal protein |                                                               |
|   | Bmp2/4               | ventral ectoderm (EB->G)  | Gain of function+/- translational inhibitor | bmp2/4               | ventral ectoderm (EB->G)                                                                                          | N/A                                                | N/A                | N/A                  | no response to short treatment with BMP4 protein  |                                                               |
|   | Bmp2/4               | ventral ectoderm (EB->G)  | Gain of function+/- translational inhibitor | dlx                  | dorsal ectoderm (MB, G)                                                                                           | N/A                                                | N/A                | N/A                  | no response to short treatment with BMP4 protein  |                                                               |
|   | Bmp2/4               | ventral ectoderm (EB->G)  | Gain of function+/- translational inhibitor | goosecoid            | ventral ectoderm (B, MB), then in a ring around the stomodeum (G)                                                 | N/A                                                | N/A                | N/A                  | no response to short treatment with BMP4 protein  |                                                               |
|   | Bmp2/4               | ventral ectoderm (EB->G)  | Gain of function+/- translational inhibitor | hox7                 | dorsal ectoderm (MB, G, Pr)                                                                                       | N/A                                                | N/A                | N/A                  | no response to short treatment with BMP4 protein  |                                                               |
|   | Bmp2/4               | ventral ectoderm (EB->G)  | Gain of function+/- translational inhibitor | irxA                 | Dorsal ectoderm (MB), then upper dorsal ectoderm + stomodeum (G)                                                  | N/A                                                | N/A                | N/A                  | no response to short treatment with BMP4 protein  |                                                               |
|   | Bmp2/4               | ventral ectoderm (EB->G)  | Gain of function+/- translational inhibitor | msx                  | Dorsal ectoderm (MB), then restricted to lower dorsal ectoderm (G)                                                | N/A                                                | N/A                | N/A                  | no response to short treatment with BMP4 protein  |                                                               |
|   | Bmp2/4               | ventral ectoderm (EB->G)  | Gain of function+/- translational inhibitor | nk2.2                | Lower ventral + dorsal ectoderm (LB -> G)                                                                         | Activation                                         | Bmp2/4 -> nk2.2    | Yes                  |                                                   |                                                               |
|   | Bmp2/4               | ventral ectoderm (EB->G)  | Gain of function+/- translational inhibitor | onecut               | Whole ectoderm early (blastula), then restricted to the ciliary band (late MB -> Pr)                              | N/A                                                | N/A                | N/A                  | no response to short treatment with BMP4 protein  |                                                               |
|   | Bmp2/4               | ventral ectoderm (EB->G)  | Gain of function+/- translational inhibitor | pax2/5/8             | Ciliary band (vegetal part) (G)                                                                                   | N/A                                                | N/A                | N/A                  | no response to short treatment with BMP4 protein  |                                                               |
|   | Bmp2/4               | ventral ectoderm (EB->G)  | Gain of function+/- translational inhibitor | smad6                | Dorsal ectoderm (MB->G)                                                                                           | Activation                                         | Bmp2/4 -> smad6    | Yes                  |                                                   |                                                               |
|   | Bmp2/4               | ventral ectoderm (EB->G)  | Gain of function+/- translational inhibitor | tbx2/3               | Dorsal ectoderm (LB->G)                                                                                           | Activation                                         | Bmp2/4 -> tbx2/3   | Yes                  |                                                   |                                                               |
|   | Bmp2/4               | ventral ectoderm (EB->G)  | Gain of function+/- translational inhibitor | wnt5                 | Lower dorsal ectoderm (MB, G)                                                                                     | N/A                                                | N/A                | N/A                  | no response to short treatment with BMP4 protein  |                                                               |

| A | Perturbed gene INPUT | Spatial domain (*) INPUT  | ASSAY            | Analyzed gene OUTPUT | Spatial domain (*) OUTPUT                                                                                                                                          | Interaction deduced between INPUT and OUTPUT genes | Summary             | Direct interaction ? | Comment                                                                                                                                                                                | Additional reference on the interaction ( <i>P. lividus</i> ) |
|---|----------------------|---------------------------|------------------|----------------------|--------------------------------------------------------------------------------------------------------------------------------------------------------------------|----------------------------------------------------|---------------------|----------------------|----------------------------------------------------------------------------------------------------------------------------------------------------------------------------------------|---------------------------------------------------------------|
|   | Nodal                | Ventral ectoderm (64C->G) | Loss of function | 29D                  | dorsal ectoderm (Pr)                                                                                                                                               | Activation                                         | Nodal -> 29D        | No                   | see Bmp2/4 loss of function + previous data indicating that Bmp2/4 is strictly required for dorsal ectoderm patterning (Lapraz et al, 2009)                                            | Duboc et al, 2004                                             |
|   | Nodal                | Ventral ectoderm (64C->G) | Loss of function | atbf1                | Lower ventral + dorsal ectoderm (G)                                                                                                                                | Activation                                         | Nodal -> atbf1      | No                   | see Bmp2/4 loss of function + previous data indicating that Bmp2/4 is strictly required for dorsal ectoderm patterning (Lapraz et al, 2009)                                            |                                                               |
|   | Nodal                | Ventral ectoderm (64C->G) | Loss of function | bmp1                 | Ventral ectoderm + Ciliary band (G, Pr)                                                                                                                            | Inhibition                                         | Nodal -> bmp1       | Unknown              |                                                                                                                                                                                        |                                                               |
|   | Nodal                | Ventral ectoderm (64C->G) | Loss of function | bmp2/4               | ventral ectoderm (EB->G)                                                                                                                                           | Activation                                         | Nodal -> bmp2/4     | Yes                  | see inductive assay in presence of translational inhibitor                                                                                                                             | Duboc et al, 2004                                             |
|   | Nodal                | Ventral ectoderm (64C->G) | Loss of function | brachyury            | ventral ectoderm, then stomodeum                                                                                                                                   | Activation                                         | Nodal -> brachyury  | No                   | see inductive assay in presence of translational inhibitor                                                                                                                             | Duboc et al, 2004                                             |
|   | Nodal                | Ventral ectoderm (64C->G) | Loss of function | chordin              | ventral ectoderm (SB->G)                                                                                                                                           | Activation                                         | Nodal -> chordin    | Yes                  | see inductive assay in presence of translational inhibitor                                                                                                                             | Lapraz et al, 2009                                            |
|   | Nodal                | Ventral ectoderm (64C->G) | Loss of function | deadringer           | Ventral ectoderm + Ciliary band (G, Pr)                                                                                                                            | Inhibition                                         | Nodal -> deadringer | Unknown              |                                                                                                                                                                                        |                                                               |
|   | Nodal                | Ventral ectoderm (64C->G) | Loss of function | delta                | Neuron precursor (Pr)                                                                                                                                              | Inhibition                                         | Nodal -> delta      | Unknown              |                                                                                                                                                                                        |                                                               |
|   | Nodal                | Ventral ectoderm (64C->G) | Loss of function | dlx                  | dorsal ectoderm (MB, G)                                                                                                                                            | Activation                                         | Nodal -> dlx        | No                   | see Bmp2/4 loss of function + previous data indicating that Bmp2/4 is strictly required for dorsal ectoderm patterning (Lapraz et al, 2009)                                            |                                                               |
|   | Nodal                | Ventral ectoderm (64C->G) | Loss of function | fgfA                 | Whole ectoderm early, then inhibited dorsally before being restricted to the ciliary band (MB, G, Pr)                                                              | Inhibition                                         | Nodal -> fgfA       | Unknown              |                                                                                                                                                                                        | Röttinger et al, 2008                                         |
|   | Nodal                | Ventral ectoderm (64C->G) | Loss of function | fgfr1                | apical + ventral ectoderm (SB->G)                                                                                                                                  | Activation                                         | Nodal -> fgfr1      | Unknown              |                                                                                                                                                                                        |                                                               |
|   | Nodal                | Ventral ectoderm (64C->G) | Loss of function | foxA                 | ventral ectoderm, then stomodeum (MB->Pr)                                                                                                                          | Activation                                         | Nodal -> foxA       | Unknown              |                                                                                                                                                                                        |                                                               |
|   | Nodal                | Ventral ectoderm (64C->G) | Loss of function | foxG                 | Ventral ectoderm + border with ciliary band - stomodeum (MB, G), then restricted to the ciliary band only (LG/Pr)                                                  | Activation                                         | Nodal -> foxG       | Unknown              | complete loss of expression before LG/Pr stage, when foxG is mainly in the ventral ectoderm                                                                                            |                                                               |
|   | Nodal                | Ventral ectoderm (64C->G) | Loss of function | gfi1                 | Ciliary band (lateMB, G, Pr)                                                                                                                                       | Inhibition                                         | Nodal -> gfi1       | Unknown              |                                                                                                                                                                                        |                                                               |
|   | Nodal                | Ventral ectoderm (64C->G) | Loss of function | glypican5            | Dorsal ectoderm (MB, G, Pr)                                                                                                                                        | Activation                                         | Nodal -> glypican5  | No                   | see Bmp2/4 loss of function + previous data indicating that Bmp2/4 is strictly required for dorsal ectoderm patterning (Lapraz et al, 2009)                                            |                                                               |
|   | Nodal                | Ventral ectoderm (64C->G) | Loss of function | goosecoid            | ventral ectoderm (B, MB), then in a ring around the stomodeum (G)                                                                                                  | Activation                                         | Nodal -> goosecoid  | Yes                  | see inductive assay in presence of translational inhibitor                                                                                                                             | Duboc et al, 2004                                             |
|   | Nodal                | Ventral ectoderm (64C->G) | Loss of function | hox7                 | dorsal ectoderm (MB, G, Pr)                                                                                                                                        | Activation                                         | Nodal -> hox7       | No                   | see Bmp2/4 loss of function + previous data indicating that Bmp2/4 is strictly required for dorsal ectoderm patterning (Lapraz et al, 2009)                                            |                                                               |
|   | Nodal                | Ventral ectoderm (64C->G) | Loss of function | id                   | dorsal ectoderm (transient, MB)                                                                                                                                    | Activation                                         | Nodal -> id         | No                   | see Bmp2/4 loss of function + previous data indicating that Bmp2/4 is strictly required for dorsal ectoderm patterning (Lapraz et al, 2009)                                            |                                                               |
|   | Nodal                | Ventral ectoderm (64C->G) | Loss of function | irxA                 | Dorsal ectoderm (MB), then upper dorsal ectoderm + stomodeum (G)                                                                                                   | Activation                                         | Nodal -> irxA       | No                   | see Bmp2/4 loss of function + previous data indicating that Bmp2/4 is strictly required for dorsal ectoderm patterning (Lapraz et al, 2009)                                            |                                                               |
|   | Nodal                | Ventral ectoderm (64C->G) | Loss of function | lefty                | ventral ectoderm (from early blastula to G)                                                                                                                        | Activation                                         | Nodal -> lefty      | Yes                  | see inductive assay in presence of translational inhibitor                                                                                                                             | Duboc et al, 2004                                             |
|   | Nodal                | Ventral ectoderm (64C->G) | Loss of function | nk2.2                | Lower ventral + dorsal ectoderm (LB -> G)                                                                                                                          | Activation                                         | Nodal -> nk2.2      | Yes                  | for the ventral part of nk2.2 expression<br>see inductive assay in presence of translational inhibitor                                                                                 |                                                               |
|   | Nodal                | Ventral ectoderm (64C->G) | Loss of function | oasis                | dorsal ectoderm (MB, G)                                                                                                                                            | Activation                                         | Nodal -> oasis      | No                   | see Bmp2/4 loss of function + previous data indicating that Bmp2/4 is strictly required for dorsal ectoderm patterning (Lapraz et al, 2009)                                            |                                                               |
|   | Nodal                | Ventral ectoderm (64C->G) | Loss of function | onecut               | Whole ectoderm early (blastula), then restricted to the ciliary band (late MB -> Pr)                                                                               | Inhibition                                         | Nodal -> onecut     | Unknown              |                                                                                                                                                                                        |                                                               |
|   | Nodal                | Ventral ectoderm (64C->G) | Loss of function | otx                  | Whole ectoderm early, inhibited in the dorsal most ectoderm (late MB -> Pr), inhibited later in central ventral ectoderm (presumptive stomodeum, LG and Pr stages) | Inhibition                                         | Nodal -> otx        | No                   | the inhibition occurs in the dorsal ectoderm at the G stage.<br>see Bmp2/4 loss of function + previous data indicating that Bmp2/4 is strictly required for dorsal ectoderm patterning |                                                               |
|   | Nodal                | Ventral ectoderm (64C->G) | Loss of function | pax2/5/8             | Ciliary band (vegetal part) (G)                                                                                                                                    | Inhibition                                         | Nodal -> pax2/5/8   | No                   | pax2/5/8 is a target of FGFA signaling                                                                                                                                                 | Röttinger et al, 2008                                         |

| A | Perturbed gene INPUT             | Spatial domain (*) INPUT  | ASSAY            | Analyzed gene OUTPUT | Spatial domain (*) OUTPUT                                                                                                                                                                   | Interaction deduced between INPUT and OUTPUT genes | Summary                                        | Direct interaction ? | Comment                                                                                                                                     | Additional reference on the interaction ( <i>P. lividus</i> ) |
|---|----------------------------------|---------------------------|------------------|----------------------|---------------------------------------------------------------------------------------------------------------------------------------------------------------------------------------------|----------------------------------------------------|------------------------------------------------|----------------------|---------------------------------------------------------------------------------------------------------------------------------------------|---------------------------------------------------------------|
|   | Nodal                            | Ventral ectoderm (64C->G) | Loss of function | smad6                | Dorsal ectoderm (MB->G)                                                                                                                                                                     | Activation                                         | Nodal -> smad6                                 | No                   | see Bmp2/4 loss of function + previous data indicating that Bmp2/4 is strictly required for dorsal ectoderm patterning (Lapraz et al, 2009) |                                                               |
|   | Nodal                            | Ventral ectoderm (64C->G) | Loss of function | tbx2/3               | Dorsal ectoderm (LB->G)                                                                                                                                                                     | Activation                                         | Nodal -> tbx2/3                                | No                   | see Bmp2/4 loss of function + previous data indicating that Bmp2/4 is strictly required for dorsal ectoderm patterning (Lapraz et al, 2009) | Duboc et al, 2004                                             |
|   | Nodal                            | Ventral ectoderm (64C->G) | Loss of function | tubulin              | ciliary band (LG and Pr). A weaker expression is present at the dorsal ectoderm apex                                                                                                        | Inhibition                                         | Nodal -> tubulin                               | Unknown              |                                                                                                                                             | Duboc et al, 2004                                             |
|   | Nodal                            | Ventral ectoderm (64C->G) | Loss of function | unc4                 | Dorsal apex (LG, Pr)                                                                                                                                                                        | Activation                                         | Nodal -> unc4                                  | No                   | see Bmp2/4 loss of function + previous data indicating that Bmp2/4 is strictly required for dorsal ectoderm patterning (Lapraz et al, 2009) |                                                               |
|   | Nodal                            | Ventral ectoderm (64C->G) | Loss of function | univin               | Whole ectoderm early, then inhibited dorsally (MB) before being restricted to the lateral part of the ciliary band (G, Pr). At G stage, a weak expression persists in the ventral ectoderm. | Inhibition                                         | Nodal -> univin                                | Unknown              |                                                                                                                                             |                                                               |
|   | Nodal                            | Ventral ectoderm (64C->G) | Loss of function | wnt5                 | Lower dorsal ectoderm (MB, G)                                                                                                                                                               | Activation                                         | Nodal -> wnt5                                  | No                   | see Bmp2/4 loss of function + previous data indicating that Bmp2/4 is strictly required for dorsal ectoderm patterning (Lapraz et al, 2009) |                                                               |
|   | Nodal                            | Ventral ectoderm (64C->G) | Loss of function | wnt8                 | ventral ectoderm + lateral ectoderm (MB), then restricted to the ciliary band (G, Pr)                                                                                                       | Inhibition                                         | Nodal -> wnt8                                  | Unknown              |                                                                                                                                             |                                                               |
|   | Alk4/5/7 (Nodal type I receptor) | Ubiquitous                | Loss of function | admp2                | Lower dorsal ectoderm (MB, G)                                                                                                                                                               | Activation                                         | Alk4/5/7 (Nodal type I receptor) -> admp2      | No                   | see Bmp2/4 loss of function + previous data indicating that Bmp2/4 is strictly required for dorsal ectoderm patterning (Lapraz et al, 2009) |                                                               |
|   | Alk4/5/7 (Nodal type I receptor) | Ubiquitous                | Loss of function | atbf1                | Lower ventral + dorsal ectoderm (G)                                                                                                                                                         | Activation                                         | Alk4/5/7 (Nodal type I receptor) -> atbf1      | No                   | see Bmp2/4 loss of function + previous data indicating that Bmp2/4 is strictly required for dorsal ectoderm patterning (Lapraz et al, 2009) |                                                               |
|   | Alk4/5/7 (Nodal type I receptor) | Ubiquitous                | Loss of function | bmp1                 | Ventral ectoderm + Ciliary band (G, Pr)                                                                                                                                                     | Inhibition                                         | Alk4/5/7 (Nodal type I receptor) -> bmp1       | Unknown              |                                                                                                                                             |                                                               |
|   | Alk4/5/7 (Nodal type I receptor) | Ubiquitous                | Loss of function | bmp2/4               | ventral ectoderm (EB->G)                                                                                                                                                                    | Activation                                         | Alk4/5/7 (Nodal type I receptor) -> bmp2/4     | Yes                  | see inductive assay in presence of translational inhibitor                                                                                  |                                                               |
|   | Alk4/5/7 (Nodal type I receptor) | Ubiquitous                | Loss of function | brachyury            | ventral ectoderm, then stomodeum                                                                                                                                                            | Activation                                         | Alk4/5/7 (Nodal type I receptor) -> brachyury  | No                   | see inductive assay in presence of translational inhibitor                                                                                  |                                                               |
|   | Alk4/5/7 (Nodal type I receptor) | Ubiquitous                | Loss of function | chordin              | ventral ectoderm (SB->G)                                                                                                                                                                    | Activation                                         | Alk4/5/7 (Nodal type I receptor) -> chordin    | Yes                  | see inductive assay in presence of translational inhibitor                                                                                  | Lapraz et al, 2009                                            |
|   | Alk4/5/7 (Nodal type I receptor) | Ubiquitous                | Loss of function | deadringer           | Ventral ectoderm + Ciliary band (G, Pr)                                                                                                                                                     | Inhibition                                         | Alk4/5/7 (Nodal type I receptor) -> deadringer | Unknown              |                                                                                                                                             |                                                               |
|   | Alk4/5/7 (Nodal type I receptor) | Ubiquitous                | Loss of function | delta                | Neuron precursor (Pr)                                                                                                                                                                       | Inhibition                                         | Alk4/5/7 (Nodal type I receptor) -> delta      | Unknown              |                                                                                                                                             |                                                               |
|   | Alk4/5/7 (Nodal type I receptor) | Ubiquitous                | Loss of function | fgfA                 | Whole ectoderm early, then inhibited dorsally before being restricted to the ciliary band (MB, G, Pr)                                                                                       | Inhibition                                         | Alk4/5/7 (Nodal type I receptor) -> fgfA       | Unknown              |                                                                                                                                             |                                                               |
|   | Alk4/5/7 (Nodal type I receptor) | Ubiquitous                | Loss of function | foxA                 | ventral ectoderm, then stomodeum (MB->Pr)                                                                                                                                                   | activation                                         | Alk4/5/7 (Nodal type I receptor) -> foxA       | Unknown              |                                                                                                                                             |                                                               |
|   | Alk4/5/7 (Nodal type I receptor) | Ubiquitous                | Loss of function | foxG                 | Ventral ectoderm + border with ciliary band - stomodeum (MB, G), then restricted to the ciliary band only (LG/Pr)                                                                           | activation                                         | Alk4/5/7 (Nodal type I receptor) -> foxG       | Unknown              |                                                                                                                                             |                                                               |
|   | Alk4/5/7 (Nodal type I receptor) | Ubiquitous                | Loss of function | foxQ2                | whole ectoderm early, then restricted to apical domain (B, MB, G)                                                                                                                           | Independent                                        | N/A                                            | N/A                  |                                                                                                                                             |                                                               |
|   | Alk4/5/7 (Nodal type I receptor) | Ubiquitous                | Loss of function | gfi1                 | Ciliary band (lateMB, G, Pr)                                                                                                                                                                | Inhibition                                         | Alk4/5/7 (Nodal type I receptor) -> gfi1       | Unknown              |                                                                                                                                             |                                                               |

| A | Perturbed gene INPUT             | Spatial domain (*) INPUT | ASSAY            | Analyzed gene OUTPUT | Spatial domain (*) OUTPUT                                                                                                                                                                   | Interaction deduced between INPUT and OUTPUT genes | Summary                                       | Direct interaction ? | Comment                                                                                                                                     | Additional reference on the interaction ( <i>P. lividus</i> ) |
|---|----------------------------------|--------------------------|------------------|----------------------|---------------------------------------------------------------------------------------------------------------------------------------------------------------------------------------------|----------------------------------------------------|-----------------------------------------------|----------------------|---------------------------------------------------------------------------------------------------------------------------------------------|---------------------------------------------------------------|
|   | Alk4/5/7 (Nodal type I receptor) | Ubiquitous               | Loss of function | goosecoid            | ventral ectoderm (B, MB), then in a ring around the stomodeum (G)                                                                                                                           | activation                                         | Alk4/5/7 (Nodal type I receptor) -> goosecoid | Unknown              |                                                                                                                                             |                                                               |
|   | Alk4/5/7 (Nodal type I receptor) | Ubiquitous               | Loss of function | hox7                 | dorsal ectoderm (MB, G, Pr)                                                                                                                                                                 | activation                                         | Alk4/5/7 (Nodal type I receptor) -> hox7      | No                   | see Bmp2/4 loss of function + previous data indicating that Bmp2/4 is strictly required for dorsal ectoderm patterning (Lapraz et al, 2009) |                                                               |
|   | Alk4/5/7 (Nodal type I receptor) | Ubiquitous               | Loss of function | irxA                 | Dorsal ectoderm (MB), then upper dorsal ectoderm + stomodeum (G)                                                                                                                            | activation                                         | Alk4/5/7 (Nodal type I receptor) -> irxA      | Unknown              |                                                                                                                                             |                                                               |
|   | Alk4/5/7 (Nodal type I receptor) | Ubiquitous               | Loss of function | lefty                | ventral ectoderm (from early blastula to G)                                                                                                                                                 | activation                                         | Alk4/5/7 (Nodal type I receptor) -> lefty     | Yes                  | see inductive assay in presence of translational inhibitor                                                                                  |                                                               |
|   | Alk4/5/7 (Nodal type I receptor) | Ubiquitous               | Loss of function | msx                  | Dorsal ectoderm (MB), then restricted to lower dorsal ectoderm (G)                                                                                                                          | activation                                         | Alk4/5/7 (Nodal type I receptor) -> msx       | No                   | see Bmp2/4 loss of function + previous data indicating that Bmp2/4 is strictly required for dorsal ectoderm patterning (Lapraz et al, 2009) |                                                               |
|   | Alk4/5/7 (Nodal type I receptor) | Ubiquitous               | Loss of function | nk1                  | ventral ectoderm (lower half/vegetal)                                                                                                                                                       | activation                                         | Alk4/5/7 (Nodal type I receptor) -> nk1       | Unknown              |                                                                                                                                             |                                                               |
|   | Alk4/5/7 (Nodal type I receptor) | Ubiquitous               | Loss of function | nk2.2                | Lower ventral + dorsal ectoderm (LB -> G)                                                                                                                                                   | activation                                         | Alk4/5/7 (Nodal type I receptor) -> nk2.2     | Yes                  | for the ventral part of nk2.2 expression see inductive assay in presence of translational inhibitor                                         |                                                               |
|   | Alk4/5/7 (Nodal type I receptor) | Ubiquitous               | Loss of function | onecut               | Whole ectoderm early (blastula), then restricted to the ciliary band (late MB -> Pr)                                                                                                        | Inhibition                                         | Alk4/5/7 (Nodal type I receptor) -> onecut    | Unknown              |                                                                                                                                             |                                                               |
|   | Alk4/5/7 (Nodal type I receptor) | Ubiquitous               | Loss of function | otx                  | Whole ectoderm early, inhibited in the dorsal most ectoderm (late MB -> Pr), inhibited later in central ventral ectoderm (presumptive stomodeum, LG and Pr stages)                          | Inhibition                                         | Alk4/5/7 (Nodal type I receptor) -> otx       | Unknown              |                                                                                                                                             |                                                               |
|   | Alk4/5/7 (Nodal type I receptor) | Ubiquitous               | Loss of function | pax2/5/8             | Ciliary band (vegetal part) (G)                                                                                                                                                             | Inhibition                                         | Alk4/5/7 (Nodal type I receptor) -> pax2/5/8  | Unknown              |                                                                                                                                             |                                                               |
|   | Alk4/5/7 (Nodal type I receptor) | Ubiquitous               | Loss of function | smad6                | Dorsal ectoderm (MB->G)                                                                                                                                                                     | activation                                         | Alk4/5/7 (Nodal type I receptor) -> smad6     | Unknown              |                                                                                                                                             |                                                               |
|   | Alk4/5/7 (Nodal type I receptor) | Ubiquitous               | Loss of function | tbx2/3               | Dorsal ectoderm (LB->G)                                                                                                                                                                     | activation                                         | Alk4/5/7 (Nodal type I receptor) -> tbx2/3    | Unknown              |                                                                                                                                             |                                                               |
|   | Alk4/5/7 (Nodal type I receptor) | Ubiquitous               | Loss of function | unc4                 | Dorsal apex (LG, Pr)                                                                                                                                                                        | activation                                         | Alk4/5/7 (Nodal type I receptor) -> unc4      | Unknown              |                                                                                                                                             |                                                               |
|   | Alk4/5/7 (Nodal type I receptor) | Ubiquitous               | Loss of function | univin               | Whole ectoderm early, then inhibited dorsally (MB) before being restricted to the lateral part of the ciliary band (G, Pr). At G stage, a weak expression persists in the ventral ectoderm. | Inhibition                                         | Alk4/5/7 (Nodal type I receptor) -> univin    | Unknown              |                                                                                                                                             |                                                               |
|   | Alk4/5/7 (Nodal type I receptor) | Ubiquitous               | Loss of function | wnt5                 | Lower dorsal ectoderm (MB, G)                                                                                                                                                               | activation                                         | Alk4/5/7 (Nodal type I receptor) -> wnt5      | Unknown              |                                                                                                                                             |                                                               |
|   | Alk4/5/7 (Nodal type I receptor) | Ubiquitous               | Loss of function | wnt8                 | ventral ectoderm + lateral ectoderm (MB), then restricted to the ciliary band (G, Pr)                                                                                                       | Inhibition                                         | Alk4/5/7 (Nodal type I receptor) -> wnt8      | Unknown              |                                                                                                                                             |                                                               |
|   | Bmp2/4                           | ventral ectoderm (EB->G) | Loss of function | 29D                  | dorsal ectoderm (Pr)                                                                                                                                                                        | Activation                                         | Bmp2/4 -> 29D                                 | Unknown              |                                                                                                                                             | Duboc et al, 2004                                             |
|   | Bmp2/4                           | ventral ectoderm (EB->G) | Loss of function | atbf1                | Lower ventral + dorsal ectoderm (G)                                                                                                                                                         | Activation                                         | Bmp2/4 -> atbf1                               | Unknown              |                                                                                                                                             |                                                               |
|   | Bmp2/4                           | ventral ectoderm (EB->G) | Loss of function | deadringer           | Ventral ectoderm + Ciliary band (G, Pr)                                                                                                                                                     | Inhibition                                         | Bmp2/4 -> deadringer                          | Unknown              |                                                                                                                                             |                                                               |
|   | Bmp2/4                           | ventral ectoderm (EB->G) | Loss of function | fgfA                 | Whole ectoderm early, then inhibited dorsally before being restricted to the ciliary band (MB, G, Pr)                                                                                       | Inhibition                                         | Bmp2/4 -> fgfA                                | Unknown              |                                                                                                                                             |                                                               |
|   | Bmp2/4                           | ventral ectoderm (EB->G) | Loss of function | foxG                 | Ventral ectoderm + border with ciliary band - stomodeum (MB, G), then restricted to the ciliary band only (LG/Pr)                                                                           | Inhibition                                         | Bmp2/4 -> foxG                                | Unknown              |                                                                                                                                             |                                                               |
|   | Bmp2/4                           | ventral ectoderm (EB->G) | Loss of function | gfi1                 | Ciliary band (lateMB, G, Pr)                                                                                                                                                                | Inhibition                                         | Bmp2/4 -> gfi1                                | Unknown              |                                                                                                                                             |                                                               |

| A | Perturbed gene INPUT         | Spatial domain (*) INPUT | ASSAY            | Analyzed gene OUTPUT | Spatial domain (*) OUTPUT                                                                                                                                                                   | Interaction deduced between INPUT and OUTPUT genes | Summary                              | Direct interaction ? | Comment                                                    | Additional reference on the interaction ( <i>P. lividus</i> ) |
|---|------------------------------|--------------------------|------------------|----------------------|---------------------------------------------------------------------------------------------------------------------------------------------------------------------------------------------|----------------------------------------------------|--------------------------------------|----------------------|------------------------------------------------------------|---------------------------------------------------------------|
|   | Bmp2/4                       | ventral ectoderm (EB->G) | Loss of function | hox7                 | dorsal ectoderm (MB, G, Pr)                                                                                                                                                                 | Activation                                         | Bmp2/4 -> hox7                       | Unknown              |                                                            |                                                               |
|   | Bmp2/4                       | ventral ectoderm (EB->G) | Loss of function | irxA                 | Dorsal ectoderm (MB), then upper dorsal ectoderm + stomodeum (G)                                                                                                                            | Activation                                         | Bmp2/4 -> irxA                       | Unknown              |                                                            |                                                               |
|   | Bmp2/4                       | ventral ectoderm (EB->G) | Loss of function | nk2.2                | Lower ventral + dorsal ectoderm (LB -> G)                                                                                                                                                   | Activation                                         | Bmp2/4 -> nk2.2                      | Yes                  | see inductive assay in presence of translational inhibitor |                                                               |
|   | Bmp2/4                       | ventral ectoderm (EB->G) | Loss of function | otx                  | Whole ectoderm early, inhibited in the dorsal most ectoderm (late MB -> Pr), inhibited later in central ventral ectoderm (presumptive stomodeum, LG and Pr stages)                          | Inhibition                                         | Bmp2/4 -> otx                        | Unknown              |                                                            |                                                               |
|   | Bmp2/4                       | ventral ectoderm (EB->G) | Loss of function | pax2/5/8             | Ciliary band (vegetal part) (G)                                                                                                                                                             | Inhibition                                         | Bmp2/4 -> pax2/5/8                   | Unknown              |                                                            |                                                               |
|   | Bmp2/4                       | ventral ectoderm (EB->G) | Loss of function | smad6                | Dorsal ectoderm (MB->G)                                                                                                                                                                     | Activation                                         | Bmp2/4 -> smad6                      | Yes                  | see inductive assay in presence of translational inhibitor |                                                               |
|   | Bmp2/4                       | ventral ectoderm (EB->G) | Loss of function | tbx2/3               | Dorsal ectoderm (LB->G)                                                                                                                                                                     | Activation                                         | Bmp2/4 -> tbx2/3                     | Yes                  | see inductive assay in presence of translational inhibitor | Duboc et al, 2004<br>Lapraz et al, 2009                       |
|   | Bmp2/4                       | ventral ectoderm (EB->G) | Loss of function | unc4                 | Dorsal apex (LG, Pr)                                                                                                                                                                        | Activation                                         | Bmp2/4 -> unc4                       | Unknown              |                                                            |                                                               |
|   | Bmp2/4                       | ventral ectoderm (EB->G) | Loss of function | univin               | Whole ectoderm early, then inhibited dorsally (MB) before being restricted to the lateral part of the ciliary band (G, Pr). At G stage, a weak expression persists in the ventral ectoderm. | Inhibition                                         | Bmp2/4 -> univin                     | Unknown              |                                                            |                                                               |
|   | Bmp2/4                       | ventral ectoderm (EB->G) | Loss of function | wnt5                 | Lower dorsal ectoderm (MB, G)                                                                                                                                                               | Activation                                         | Bmp2/4 -> wnt5                       | Unknown              |                                                            |                                                               |
|   | Bmp2/4                       | ventral ectoderm (EB->G) | Loss of function | wnt8                 | ventral ectoderm + lateral ectoderm (MB), then restricted to the ciliary band (G, Pr)                                                                                                       | Inhibition                                         | Bmp2/4 -> wnt8                       | Unknown              |                                                            |                                                               |
|   | Alk3/6 (BMP type I receptor) | Ubiquitous               | Loss of function | 29D                  | dorsal ectoderm (Pr)                                                                                                                                                                        | Activation                                         | Alk3/6 (BMP type I receptor) -> 29D  | Unknown              |                                                            |                                                               |
|   | Alk3/6 (BMP type I receptor) | Ubiquitous               | Loss of function | bmp1                 | Ventral ectoderm + Ciliary band (G, Pr)                                                                                                                                                     | Inhibition                                         | Alk3/6 (BMP type I receptor) -> bmp1 | Unknown              |                                                            |                                                               |
|   | Alk3/6 (BMP type I receptor) | Ubiquitous               | Loss of function | bmp2/4               | ventral ectoderm (EB->G)                                                                                                                                                                    | Independent                                        | N/A                                  | N/A                  |                                                            |                                                               |
|   | Alk3/6 (BMP type I receptor) | Ubiquitous               | Loss of function | brachyury            | ventral ectoderm, then stomodeum                                                                                                                                                            | Independent                                        | N/A                                  | N/A                  |                                                            |                                                               |
|   | Alk3/6 (BMP type I receptor) | Ubiquitous               | Loss of function | chordin              | ventral ectoderm (SB->G)                                                                                                                                                                    | Independent                                        | N/A                                  | N/A                  |                                                            |                                                               |
|   | Alk3/6 (BMP type I receptor) | Ubiquitous               | Loss of function | dlx                  | dorsal ectoderm (MB, G)                                                                                                                                                                     | Activation                                         | Alk3/6 (BMP type I receptor) -> dlx  | Unknown              |                                                            |                                                               |
|   | Alk3/6 (BMP type I receptor) | Ubiquitous               | Loss of function | fgfA                 | Whole ectoderm early, then inhibited dorsally before being restricted to the ciliary band (MB, G, Pr)                                                                                       | Inhibition                                         | Alk3/6 (BMP type I receptor) -> fgfA | Unknown              |                                                            |                                                               |
|   | Alk3/6 (BMP type I receptor) | Ubiquitous               | Loss of function | fgfr1                | apical + ventral ectoderm (SB->G)                                                                                                                                                           | Independent                                        | N/A                                  | N/A                  | not shown                                                  |                                                               |
|   | Alk3/6 (BMP type I receptor) | Ubiquitous               | Loss of function | foxA                 | ventral ectoderm, then stomodeum (MB->Pr)                                                                                                                                                   | Independent                                        | N/A                                  | N/A                  |                                                            |                                                               |
|   | Alk3/6 (BMP type I receptor) | Ubiquitous               | Loss of function | foxG                 | Ventral ectoderm + border with ciliary band - stomodeum (MB, G), then restricted to the ciliary band only (LG/Pr)                                                                           | Inhibition                                         | Alk3/6 (BMP type I receptor) -> foxG | Unknown              |                                                            |                                                               |
|   | Alk3/6 (BMP type I receptor) | Ubiquitous               | Loss of function | gfi1                 | Ciliary band (lateMB, G, Pr)                                                                                                                                                                | Inhibition                                         | Alk3/6 (BMP type I receptor) -> gfi1 | Unknown              |                                                            |                                                               |



| A | Perturbed gene INPUT         | Spatial domain (*) INPUT                                          | ASSAY            | Analyzed gene OUTPUT | Spatial domain (*) OUTPUT                                                                                                                                                                   | Interaction deduced between INPUT and OUTPUT genes | Summary                                   | Direct interaction ? | Comment                                                    | Additional reference on the interaction ( <i>P. lividus</i> ) |
|---|------------------------------|-------------------------------------------------------------------|------------------|----------------------|---------------------------------------------------------------------------------------------------------------------------------------------------------------------------------------------|----------------------------------------------------|-------------------------------------------|----------------------|------------------------------------------------------------|---------------------------------------------------------------|
|   | Alk3/6 (BMP type I receptor) | Ubiquitous                                                        | Loss of function | glypican5            | Dorsal ectoderm (MB, G, Pr)                                                                                                                                                                 | Activation                                         | Alk3/6 (BMP type I receptor) -> glypican5 | Unknown              | lapraz et al, 2009                                         |                                                               |
|   | Alk3/6 (BMP type I receptor) | Ubiquitous                                                        | Loss of function | id                   | dorsal ectoderm (transient, MB)                                                                                                                                                             | Activation                                         | Alk3/6 (BMP type I receptor) -> id        | Unknown              |                                                            |                                                               |
|   | Alk3/6 (BMP type I receptor) | Ubiquitous                                                        | Loss of function | irxA                 | Dorsal ectoderm (MB), then upper dorsal ectoderm + stomodeum (G)                                                                                                                            | Activation                                         | Alk3/6 (BMP type I receptor) -> irxA      | Unknown              |                                                            |                                                               |
|   | Alk3/6 (BMP type I receptor) | Ubiquitous                                                        | Loss of function | msx                  | Dorsal ectoderm (MB), then restricted to lower dorsal ectoderm (G)                                                                                                                          | Activation                                         | Alk3/6 (BMP type I receptor) -> msx       | Unknown              |                                                            |                                                               |
|   | Alk3/6 (BMP type I receptor) | Ubiquitous                                                        | Loss of function | nk2.2                | Lower ventral + dorsal ectoderm (LB -> G)                                                                                                                                                   | Activation                                         | Alk3/6 (BMP type I receptor) -> nk2.2     | Yes                  | see inductive assay in presence of translational inhibitor |                                                               |
|   | Alk3/6 (BMP type I receptor) | Ubiquitous                                                        | Loss of function | nodal                | Ventral ectoderm (64C->G)                                                                                                                                                                   | Independent                                        | N/A                                       | N/A                  |                                                            |                                                               |
|   | Alk3/6 (BMP type I receptor) | Ubiquitous                                                        | Loss of function | onecut               | Whole ectoderm early (blastula), then restricted to the ciliary band (late MB -> Pr)                                                                                                        | Inhibition                                         | Alk3/6 (BMP type I receptor) -> onecut    | Unknown              |                                                            | Lapraz et al, 2009                                            |
|   | Alk3/6 (BMP type I receptor) | Ubiquitous                                                        | Loss of function | otx                  | Whole ectoderm early, inhibited in the dorsal most ectoderm (late MB -> Pr), inhibited later in central ventral ectoderm (presumptive stomodeum, LG and Pr stages)                          | Inhibition                                         | Alk3/6 (BMP type I receptor) -> otx       | Unknown              |                                                            |                                                               |
|   | Alk3/6 (BMP type I receptor) | Ubiquitous                                                        | Loss of function | pax2/5/8             | Ciliary band (vegetal part) (G)                                                                                                                                                             | Inhibition                                         | Alk3/6 (BMP type I receptor) -> pax2/5/8  | Unknown              |                                                            |                                                               |
|   | Alk3/6 (BMP type I receptor) | Ubiquitous                                                        | Loss of function | smad6                | Dorsal ectoderm (MB->G)                                                                                                                                                                     | Activation                                         | Alk3/6 (BMP type I receptor) -> smad6     | Yes                  | see inductive assay in presence of translational inhibitor |                                                               |
|   | Alk3/6 (BMP type I receptor) | Ubiquitous                                                        | Loss of function | tbx2/3               | Dorsal ectoderm (LB->G)                                                                                                                                                                     | Activation                                         | Alk3/6 (BMP type I receptor) -> tbx2/3    | Yes                  | see inductive assay in presence of translational inhibitor | Lapraz et al, 2009                                            |
|   | Alk3/6 (BMP type I receptor) | Ubiquitous                                                        | Loss of function | tubulin              | ciliary band (LG and Pr). A weaker expression is present at the dorsal ectoderm apex                                                                                                        | Activation                                         | Alk3/6 (BMP type I receptor) -> tubulin   | Unknown              |                                                            |                                                               |
|   | Alk3/6 (BMP type I receptor) | Ubiquitous                                                        | Loss of function | univin               | Whole ectoderm early, then inhibited dorsally (MB) before being restricted to the lateral part of the ciliary band (G, Pr). At G stage, a weak expression persists in the ventral ectoderm. | Inhibition                                         | Alk3/6 (BMP type I receptor) -> univin    | Unknown              |                                                            |                                                               |
|   | Alk3/6 (BMP type I receptor) | Ubiquitous                                                        | Loss of function | wnt5                 | Lower dorsal ectoderm (MB, G)                                                                                                                                                               | Activation                                         | Alk3/6 (BMP type I receptor) -> wnt5      | Unknown              |                                                            |                                                               |
|   | Alk3/6 (BMP type I receptor) | Ubiquitous                                                        | Loss of function | wnt8                 | ventral ectoderm + lateral ectoderm (MB), then restricted to the ciliary band (G, Pr)                                                                                                       | Inhibition                                         | Alk3/6 (BMP type I receptor) -> wnt8      | Unknown              |                                                            |                                                               |
|   | Goosecoid                    | ventral ectoderm (B, MB), then in a ring around the stomodeum (G) | Loss of function | bmp1                 | Ventral ectoderm + Ciliary band (G, Pr)                                                                                                                                                     | Independent                                        | N/A                                       | N/A                  | not shown                                                  |                                                               |
|   | Goosecoid                    | ventral ectoderm (B, MB), then in a ring around the stomodeum (G) | Loss of function | bmp2/4               | ventral ectoderm (EB->G)                                                                                                                                                                    | Independent                                        | N/A                                       | N/A                  |                                                            |                                                               |
|   | Goosecoid                    | ventral ectoderm (B, MB), then in a ring around the stomodeum (G) | Loss of function | brachyury            | ventral ectoderm, then stomodeum                                                                                                                                                            | Activation                                         | Goosecoid -> brachyury                    | Unknown              |                                                            |                                                               |
|   | Goosecoid                    | ventral ectoderm (B, MB), then in a ring around the stomodeum (G) | Loss of function | chordin              | ventral ectoderm (SB->G)                                                                                                                                                                    | Independent                                        | N/A                                       | N/A                  |                                                            |                                                               |
|   | Goosecoid                    | ventral ectoderm (B, MB), then in a ring around the stomodeum (G) | Loss of function | foxA                 | ventral ectoderm, then stomodeum (MB->Pr)                                                                                                                                                   | Activation                                         | Goosecoid -> foxA                         | Unknown              |                                                            |                                                               |

| A | Perturbed gene INPUT | Spatial domain (*) INPUT                                          | ASSAY            | Analyzed gene OUTPUT | Spatial domain (*) OUTPUT                                                                                                                                                                   | Interaction deduced between INPUT and OUTPUT genes | Summary                 | Direct interaction ? | Comment   | Additional reference on the interaction ( <i>P. lividus</i> ) |
|---|----------------------|-------------------------------------------------------------------|------------------|----------------------|---------------------------------------------------------------------------------------------------------------------------------------------------------------------------------------------|----------------------------------------------------|-------------------------|----------------------|-----------|---------------------------------------------------------------|
|   | Goosecoid            | ventral ectoderm (B, MB), then in a ring around the stomodeum (G) | Loss of function | foxG                 | Ventral ectoderm + border with ciliary band - stomodeum (MB, G), then restricted to the ciliary band only (LG/Pr)                                                                           | Inhibition                                         | Goosecoid -> foxG       | Unknown              |           |                                                               |
|   | Goosecoid            | ventral ectoderm (B, MB), then in a ring around the stomodeum (G) | Loss of function | gfi1                 | Ciliary band (lateMB, G, Pr)                                                                                                                                                                | Independent                                        | N/A                     | N/A                  | not shown |                                                               |
|   | Goosecoid            | ventral ectoderm (B, MB), then in a ring around the stomodeum (G) | Loss of function | hox7                 | dorsal ectoderm (MB, G, Pr)                                                                                                                                                                 | Independent                                        | N/A                     | N/A                  | not shown |                                                               |
|   | Goosecoid            | ventral ectoderm (B, MB), then in a ring around the stomodeum (G) | Loss of function | msx                  | Dorsal ectoderm (MB), then restricted to lower dorsal ectoderm (G)                                                                                                                          | Independent                                        | N/A                     | N/A                  | not shown |                                                               |
|   | Goosecoid            | ventral ectoderm (B, MB), then in a ring around the stomodeum (G) | Loss of function | otx                  | Whole ectoderm early, inhibited in the dorsal most ectoderm (late MB -> Pr), inhibited later in central ventral ectoderm (presumptive stomodeum, LG and Pr stages)                          | Independent                                        | N/A                     | N/A                  | not shown |                                                               |
|   | Goosecoid            | ventral ectoderm (B, MB), then in a ring around the stomodeum (G) | Loss of function | tbx2/3               | Dorsal ectoderm (LB->G)                                                                                                                                                                     | Independent                                        | N/A                     | N/A                  | not shown |                                                               |
|   | Goosecoid            | ventral ectoderm (B, MB), then in a ring around the stomodeum (G) | Loss of function | univin               | Whole ectoderm early, then inhibited dorsally (MB) before being restricted to the lateral part of the ciliary band (G, Pr). At G stage, a weak expression persists in the ventral ectoderm. | Inhibition                                         | Goosecoid -> univin     | Unknown              |           |                                                               |
|   | Goosecoid            | ventral ectoderm (B, MB), then in a ring around the stomodeum (G) | Loss of function | wnt8                 | ventral ectoderm + lateral ectoderm (MB), then restricted to the ciliary band (G, Pr)                                                                                                       | Inhibition                                         | Goosecoid -> wnt8       | Unknown              |           |                                                               |
|   | Goosecoid            | ventral ectoderm (B, MB), then in a ring around the stomodeum (G) | Gain of function | brachyury            | ventral ectoderm, then stomodeum                                                                                                                                                            | Activation                                         | Goosecoid -> brachyury  | Unknown              |           |                                                               |
|   | Goosecoid            | ventral ectoderm (B, MB), then in a ring around the stomodeum (G) | Gain of function | deadringer           | Ventral ectoderm + Ciliary band (G, Pr)                                                                                                                                                     | Activation                                         | Goosecoid -> deadringer | Unknown              |           |                                                               |
|   | Goosecoid            | ventral ectoderm (B, MB), then in a ring around the stomodeum (G) | Gain of function | egip                 | Ciliary band + Dorsal ectoderm (strong at the apex, weaker elsewhere) (LG, Pr)                                                                                                              | Inhibition                                         | Goosecoid -> egip       | Unknown              |           |                                                               |
|   | Goosecoid            | ventral ectoderm (B, MB), then in a ring around the stomodeum (G) | Gain of function | foxA                 | ventral ectoderm, then stomodeum (MB->Pr)                                                                                                                                                   | Activation                                         | Goosecoid -> foxA       | Unknown              |           |                                                               |
|   | Goosecoid            | ventral ectoderm (B, MB), then in a ring around the stomodeum (G) | Gain of function | foxG                 | Ventral ectoderm + border with ciliary band - stomodeum (MB, G), then restricted to the ciliary band only (LG/Pr)                                                                           | Activation                                         | Goosecoid -> foxG       | Unknown              |           |                                                               |
|   | Goosecoid            | ventral ectoderm (B, MB), then in a ring around the stomodeum (G) | Gain of function | gfi1                 | Ciliary band (lateMB, G, Pr)                                                                                                                                                                | Inhibition                                         | Goosecoid -> gfi1       | Unknown              |           |                                                               |
|   | Goosecoid            | ventral ectoderm (B, MB), then in a ring around the stomodeum (G) | Gain of function | hox7                 | dorsal ectoderm (MB, G, Pr)                                                                                                                                                                 | Inhibition                                         | Goosecoid -> hox7       | Unknown              |           |                                                               |
|   | Goosecoid            | ventral ectoderm (B, MB), then in a ring around the stomodeum (G) | Gain of function | msx                  | Dorsal ectoderm (MB), then restricted to lower dorsal ectoderm (G)                                                                                                                          | Inhibition                                         | Goosecoid -> msx        | Unknown              |           |                                                               |
|   | Goosecoid            | ventral ectoderm (B, MB), then in a ring around the stomodeum (G) | Gain of function | onecut               | Whole ectoderm early (blastula), then restricted to the ciliary band (late MB -> Pr)                                                                                                        | Inhibition                                         | Goosecoid -> onecut     | Unknown              |           |                                                               |
|   | Goosecoid            | ventral ectoderm (B, MB), then in a ring around the stomodeum (G) | Gain of function | tbx2/3               | Dorsal ectoderm (LB->G)                                                                                                                                                                     | Inhibition                                         | Goosecoid -> tbx2/3     | Unknown              | not shown |                                                               |
|   | Goosecoid            | ventral ectoderm (B, MB), then in a ring around the stomodeum (G) | Gain of function | univin               | Whole ectoderm early, then inhibited dorsally (MB) before being restricted to the lateral part of the ciliary band (G, Pr). At G stage, a weak expression persists in the ventral ectoderm. | Inhibition                                         | Goosecoid -> univin     | Unknown              |           |                                                               |
|   | Goosecoid            | ventral ectoderm (B, MB), then in a ring around the stomodeum (G) | Gain of function | wnt8                 | ventral ectoderm + lateral ectoderm (MB), then restricted to the ciliary band (G, Pr)                                                                                                       | Inhibition                                         | Goosecoid -> wnt8       | Unknown              |           |                                                               |
|   | FoxA                 | ventral ectoderm, then stomodeum (MB->Pr)                         | Loss of function | bmp2/4               | ventral ectoderm (EB->G)                                                                                                                                                                    | Independent                                        | N/A                     | N/A                  | not shown |                                                               |

| A | Perturbed gene INPUT | Spatial domain (*) INPUT                                         | ASSAY            | Analyzed gene OUTPUT | Spatial domain (*) OUTPUT                                                                             | Interaction deduced between INPUT and OUTPUT genes | Summary           | Direct interaction ? | Comment                                                                                                                                                                                                                                  | Additional reference on the interaction ( <i>P. lividus</i> ) |
|---|----------------------|------------------------------------------------------------------|------------------|----------------------|-------------------------------------------------------------------------------------------------------|----------------------------------------------------|-------------------|----------------------|------------------------------------------------------------------------------------------------------------------------------------------------------------------------------------------------------------------------------------------|---------------------------------------------------------------|
|   | FoxA                 | ventral ectoderm, then stomodeum (MB->Pr)                        | Loss of function | brachyury            | ventral ectoderm, then stomodeum                                                                      | Activation                                         | FoxA -> brachyury | Unknown              |                                                                                                                                                                                                                                          |                                                               |
|   | FoxA                 | ventral ectoderm, then stomodeum (MB->Pr)                        | Loss of function | chordin              | ventral ectoderm (SB->G)                                                                              | Independent                                        | N/A               | N/A                  |                                                                                                                                                                                                                                          |                                                               |
|   | FoxA                 | ventral ectoderm, then stomodeum (MB->Pr)                        | Loss of function | foxA                 | ventral ectoderm, then stomodeum (MB->Pr)                                                             | Activation                                         | FoxA -> foxA      | Unknown              |                                                                                                                                                                                                                                          |                                                               |
|   | FoxA                 | ventral ectoderm, then stomodeum (MB->Pr)                        | Loss of function | goosecoid            | ventral ectoderm (B, MB), then in a ring around the stomodeum (G)                                     | Independent                                        | N/A               | N/A                  | not shown                                                                                                                                                                                                                                |                                                               |
|   | Brachyury            | ventral ectoderm, then stomodeum                                 | Loss of function | foxA                 | ventral ectoderm, then stomodeum (MB->Pr)                                                             | Activation                                         | Brachyury -> foxA | Unknown              |                                                                                                                                                                                                                                          |                                                               |
|   | tbx2/3               | Dorsal ectoderm (LB->G)                                          | Loss of function | atbf1                | Lower ventral + dorsal ectoderm (G)                                                                   | Activation                                         | tbx2/3 -> atbf1   | Unknown              |                                                                                                                                                                                                                                          |                                                               |
|   | tbx2/3               | Dorsal ectoderm (LB->G)                                          | Loss of function | brachyury            | ventral ectoderm, then stomodeum                                                                      | Independent                                        | N/A               | N/A                  |                                                                                                                                                                                                                                          |                                                               |
|   | tbx2/3               | Dorsal ectoderm (LB->G)                                          | Loss of function | chordin              | ventral ectoderm (SB->G)                                                                              | Independent                                        | N/A               | N/A                  |                                                                                                                                                                                                                                          |                                                               |
|   | tbx2/3               | Dorsal ectoderm (LB->G)                                          | Loss of function | dlx                  | dorsal ectoderm (MB, G)                                                                               | Activation                                         | tbx2/3 -> dlx     | Unknown              |                                                                                                                                                                                                                                          |                                                               |
|   | tbx2/3               | Dorsal ectoderm (LB->G)                                          | Loss of function | fgfA                 | Whole ectoderm early, then inhibited dorsally before being restricted to the ciliary band (MB, G, Pr) | Independent                                        | N/A               | N/A                  |                                                                                                                                                                                                                                          |                                                               |
|   | tbx2/3               | Dorsal ectoderm (LB->G)                                          | Loss of function | foxA                 | ventral ectoderm, then stomodeum (MB->Pr)                                                             | Independent                                        | N/A               | N/A                  |                                                                                                                                                                                                                                          |                                                               |
|   | tbx2/3               | Dorsal ectoderm (LB->G)                                          | Loss of function | glypican5            | Dorsal ectoderm (MB, G, Pr)                                                                           | Independent                                        | N/A               | N/A                  | not shown                                                                                                                                                                                                                                |                                                               |
|   | tbx2/3               | Dorsal ectoderm (LB->G)                                          | Loss of function | irxA                 | Dorsal ectoderm (MB), then upper dorsal ectoderm + stomodeum (G)                                      | Activation                                         | tbx2/3 -> irxA    | Unknown              |                                                                                                                                                                                                                                          |                                                               |
|   | tbx2/3               | Dorsal ectoderm (LB->G)                                          | Loss of function | msx                  | Dorsal ectoderm (MB), then restricted to lower dorsal ectoderm (G)                                    | Activation                                         | tbx2/3 -> msx     | Unknown              |                                                                                                                                                                                                                                          |                                                               |
|   | tbx2/3               | Dorsal ectoderm (LB->G)                                          | Loss of function | onecut               | Whole ectoderm early (blastula), then restricted to the ciliary band (late MB -> Pr)                  | Independent                                        | N/A               | N/A                  |                                                                                                                                                                                                                                          |                                                               |
|   | tbx2/3               | Dorsal ectoderm (LB->G)                                          | Loss of function | pax2/5/8             | Ciliary band (vegetal part) (G)                                                                       | Independent                                        | N/A               | N/A                  |                                                                                                                                                                                                                                          |                                                               |
|   | tbx2/3               | Dorsal ectoderm (LB->G)                                          | Loss of function | smad6                | Dorsal ectoderm (MB->G)                                                                               | Activation                                         | tbx2/3 -> smad6   | Unknown              | smad6 is partially lost in tbx2/3 morphants, because it is also a direct target of BMP2/4 signaling, and therefore part of its expression rely on an input upstream of tbx2/3                                                            |                                                               |
|   | tbx2/3               | Dorsal ectoderm (LB->G)                                          | Loss of function | wnt5                 | Lower dorsal ectoderm (MB, G)                                                                         | Independent                                        | N/A               | N/A                  | not shown                                                                                                                                                                                                                                |                                                               |
|   | IrxA                 | Dorsal ectoderm (MB), then upper dorsal ectoderm                 | Loss of function | bmp1                 | Ventral ectoderm + Ciliary band (G, Pr)                                                               | Independent                                        | N/A               | N/A                  | not shown                                                                                                                                                                                                                                |                                                               |
|   | IrxA                 | Dorsal ectoderm (MB), then upper dorsal ectoderm                 | Loss of function | chordin              | ventral ectoderm (SB->G)                                                                              | Independent                                        | N/A               | N/A                  | not shown                                                                                                                                                                                                                                |                                                               |
|   | IrxA                 | Dorsal ectoderm (MB), then upper dorsal ectoderm                 | Loss of function | deadringer           | Ventral ectoderm + Ciliary band (G, Pr)                                                               | Independent                                        | N/A               | N/A                  | not shown                                                                                                                                                                                                                                |                                                               |
|   | IrxA                 | Dorsal ectoderm (MB), then upper dorsal ectoderm                 | Loss of function | foxA                 | ventral ectoderm, then stomodeum (MB->Pr)                                                             | Independent                                        | N/A               | N/A                  | not shown                                                                                                                                                                                                                                |                                                               |
|   | IrxA                 | Dorsal ectoderm (MB), then upper dorsal ectoderm                 | Loss of function | gf11                 | Ciliary band (late MB, G, Pr)                                                                         | Independent                                        | N/A               | N/A                  | not shown                                                                                                                                                                                                                                |                                                               |
|   | IrxA                 | Dorsal ectoderm (MB), then upper dorsal ectoderm                 | Loss of function | msx                  | Dorsal ectoderm (MB), then restricted to lower dor                                                    | Independent                                        | N/A               | N/A                  | not shown                                                                                                                                                                                                                                |                                                               |
|   | IrxA                 | Dorsal ectoderm (MB), then upper dorsal ectoderm + stomodeum (G) | Loss of function | onecut               | Whole ectoderm early (blastula), then restricted to the ciliary band (late MB -> Pr)                  | Inhibition                                         | IrxA -> onecut    | Unknown              | Irxa cannot account for the whole repression of onecut deduced from BMP2/4 morphants, because it occurs only in the upper dorsal ectoderm : other repressors are needed and predicted to be active at least in the lower dorsal ectoderm |                                                               |
|   | IrxA                 | Dorsal ectoderm (MB), then upper dorsal ectoderm                 | Loss of function | univin               | Whole ectoderm early, then inhibited dorsally (MB                                                     | Independent                                        | N/A               | N/A                  | not shown                                                                                                                                                                                                                                |                                                               |

| A | Perturbed gene INPUT | Spatial domain (*) INPUT                                                              | ASSAY            | Analyzed gene OUTPUT | Spatial domain (*) OUTPUT                                                                                         | Interaction deduced between INPUT and OUTPUT genes | Summary              | Direct interaction ? | Comment                                                                                                                                                                                                                                                                                | Additional reference on the interaction ( <i>P. lividus</i> ) |
|---|----------------------|---------------------------------------------------------------------------------------|------------------|----------------------|-------------------------------------------------------------------------------------------------------------------|----------------------------------------------------|----------------------|----------------------|----------------------------------------------------------------------------------------------------------------------------------------------------------------------------------------------------------------------------------------------------------------------------------------|---------------------------------------------------------------|
|   | IrxA                 | Dorsal ectoderm (MB), then upper dorsal ectoderm                                      | Loss of function | wnt5                 | Lower dorsal ectoderm (MB, G)                                                                                     | Independent                                        | N/A                  | N/A                  | not shown                                                                                                                                                                                                                                                                              |                                                               |
|   | Onecut               | Whole ectoderm early (blastula), then restricted to the ciliary band (late MB -> Pr)  | Loss of function | deadringer           | Ventral ectoderm + Ciliary band (G, Pr)                                                                           | Activation                                         | Onecut -> deadringer | Unknown              |                                                                                                                                                                                                                                                                                        |                                                               |
|   | Onecut               | Whole ectoderm early (blastula), then restricted to the ciliary band (late MB -> Pr)  | Loss of function | foxG                 | Ventral ectoderm + border with ciliary band - stomodeum (MB, G), then restricted to the ciliary band only (LG/Pr) | Activation                                         | Onecut -> foxG       | Unknown              |                                                                                                                                                                                                                                                                                        |                                                               |
|   | Onecut               | Whole ectoderm early (blastula), then restricted to the ciliary band (late MB -> Pr)  | Loss of function | gfi1                 | Ciliary band (late MB, G, Pr)                                                                                     | Activation                                         | Onecut -> gfi1       | Unknown              |                                                                                                                                                                                                                                                                                        |                                                               |
|   | Onecut               | Whole ectoderm early (blastula), then restricted to the ciliary band (late MB -> Pr)  | Loss of function | pax2/5/8             | Ciliary band (vegetal part) (G)                                                                                   | Activation                                         | Onecut -> pax2/5/8   | Unknown              |                                                                                                                                                                                                                                                                                        |                                                               |
|   | Onecut               | Whole ectoderm early (blastula), then restricted to the ciliary band (late MB -> Pr)  | Loss of function | wnt5                 | Lower dorsal ectoderm (MB, G)                                                                                     | Independent                                        | N/A                  | N/A                  | not shown                                                                                                                                                                                                                                                                              |                                                               |
|   | Wnt8                 | ventral ectoderm + lateral ectoderm (MB), then restricted to the ciliary band (G, Pr) | Loss of function | nodal                | Ventral ectoderm (64C->G)                                                                                         | Activation                                         | Wnt8 -> nodal        | Unknown              | required for nodal expression maintenance (MB)                                                                                                                                                                                                                                         |                                                               |
|   | chordin              | ventral ectoderm (SB->G)                                                              | Loss of function | bmp2/4               | ventral ectoderm (EB->G)                                                                                          | Activation                                         |                      | No                   | chordin inhibition leads to transient activation of BMP2/4 signaling in the ventral territory, resulting in Nodal inhibition, finally ending with the inhibition of Nodal downstream targets (Bmp2/4 included)                                                                         |                                                               |
|   | chordin              | ventral ectoderm (SB->G)                                                              | Loss of function | chordin              | ventral ectoderm (SB->G)                                                                                          | Activation                                         |                      | No                   | chordin inhibition leads to transient activation of BMP2/4 signaling in the ventral territory, resulting in Nodal inhibition, finally ending with the inhibition of Nodal downstream targets (Bmp2/4 included)                                                                         |                                                               |
|   | chordin              | ventral ectoderm (SB->G)                                                              | Loss of function | goosecoid            | ventral ectoderm (B, MB), then in a ring around the stomodeum (G)                                                 | Activation                                         |                      | No                   | chordin inhibition leads to transient activation of BMP2/4 signaling in the ventral territory, resulting in Nodal inhibition, finally ending with the inhibition of Nodal downstream targets (Bmp2/4 included)                                                                         |                                                               |
|   | chordin              | ventral ectoderm (SB->G)                                                              | Loss of function | msx                  | Dorsal ectoderm (MB), then restricted to lower dorsal ectoderm (G)                                                | Activation                                         |                      | No                   | chordin inhibition leads to transient activation of BMP2/4 signaling in the ventral territory, resulting in Nodal inhibition, finally ending with the inhibition of Nodal downstream targets (Bmp2/4 included)                                                                         |                                                               |
|   | chordin              | ventral ectoderm (SB->G)                                                              | Loss of function | nodal                | Ventral ectoderm (64C->G)                                                                                         | Activation                                         |                      | No                   | chordin inhibition leads to transient activation of BMP2/4 signaling in the ventral territory, resulting in Nodal inhibition, finally ending with the inhibition of Nodal downstream targets (Bmp2/4 included)                                                                         |                                                               |
|   | chordin              | ventral ectoderm (SB->G)                                                              | Loss of function | onecut               | Whole ectoderm early (blastula), then restricted to the ciliary band (late MB -> Pr)                              | inhibition                                         |                      | No                   | chordin inhibition leads to transient activation of BMP2/4 signaling in the ventral territory, resulting in Nodal inhibition, finally ending with the inhibition of Nodal downstream targets (Bmp2/4 included)                                                                         |                                                               |
|   | chordin              | ventral ectoderm (SB->G)                                                              | Loss of function | tbx2/3               | Dorsal ectoderm (LB->G)                                                                                           | Activation                                         |                      | No                   | chordin inhibition leads to transient activation of BMP2/4 signaling in the ventral territory, resulting in Nodal inhibition, finally ending with the inhibition of Nodal downstream targets (Bmp2/4 included)<br>Tbx2/3 would be transiently extended when bBMP2/4 signaling expands. | Lapraz et al, 2009                                            |
|   | chordin              | ventral ectoderm (SB->G)                                                              | Loss of function | wnt5                 | Lower dorsal ectoderm (MB, G)                                                                                     | Activation                                         |                      | No                   | chordin inhibition leads to transient activation of BMP2/4 signaling in the ventral territory, resulting in Nodal inhibition, finally ending with the inhibition of Nodal downstream targets (Bmp2/4 included)                                                                         |                                                               |

| A | Perturbed gene INPUT | Spatial domain (*) INPUT | ASSAY            | Analyzed gene OUTPUT | Spatial domain (*) OUTPUT                                                            | Interaction deduced between INPUT and OUTPUT genes | Summary | Direct interaction ? | Comment                                                                                                                                                                          | Additional reference on the interaction ( <i>P. lividus</i> ) |
|---|----------------------|--------------------------|------------------|----------------------|--------------------------------------------------------------------------------------|----------------------------------------------------|---------|----------------------|----------------------------------------------------------------------------------------------------------------------------------------------------------------------------------|---------------------------------------------------------------|
|   | smad6                | Dorsal ectoderm (MB->G)  | Gain of function | chordin              | ventral ectoderm (SB->G)                                                             | Independent                                        |         | Unknown              | Smad6 seems to be able to antagonize BMP2/4 signaling but not Nodal signaling at the lower concentration, but a higher concentration results seemingly in Nodal loss of function |                                                               |
|   | smad6                | Dorsal ectoderm (MB->G)  | Gain of function | msx                  | Dorsal ectoderm (MB), then restricted to lower dorsal ectoderm (G)                   | Inhibition                                         |         | Unknown              | Smad6 seems to be able to antagonize BMP2/4 signaling but not Nodal signaling at the lower concentration, but a higher concentration results seemingly in Nodal loss of function |                                                               |
|   | smad6                | Dorsal ectoderm (MB->G)  | Gain of function | onecut               | Whole ectoderm early (blastula), then restricted to the ciliary band (late MB -> Pr) | activation                                         |         | Unknown              | Smad6 seems to be able to antagonize BMP2/4 signaling but not Nodal signaling at the lower concentration, but a higher concentration results seemingly in Nodal loss of function |                                                               |
|   | smad6                | Dorsal ectoderm (MB->G)  | Gain of function | foxA                 | ventral ectoderm, then stomodeum (MB->Pr)                                            | Independent                                        |         | Unknown              | Smad6 seems to be able to antagonize BMP2/4 signaling but not Nodal signaling at the lower concentration, but a higher concentration results seemingly in Nodal loss of function |                                                               |

| B | Perturbed gene INPUT             | Spatial domain (*) INPUT                                                                                                                                                                    | ASSAY            | Analyzed gene OUTPUT | Spatial domain (*) OUTPUT                                                                                                                                                                   | Interaction deduced from previous work | Summary                                     | Direct interaction ? | Comment                                                                                              | Reference ( <i>P. lividus</i> ) |
|---|----------------------------------|---------------------------------------------------------------------------------------------------------------------------------------------------------------------------------------------|------------------|----------------------|---------------------------------------------------------------------------------------------------------------------------------------------------------------------------------------------|----------------------------------------|---------------------------------------------|----------------------|------------------------------------------------------------------------------------------------------|---------------------------------|
|   | lefty                            | ventral ectoderm (from early blastula to G)                                                                                                                                                 | Gain of function | brachyury            | ventral ectoderm, then stomodeum                                                                                                                                                            | inhibition                             | lefty -> brachyury                          | Unknown              | Lefty is Nodal antagonist : Lefty over expression leads to Nodal signaling inhibition                | Duboc et al, 2008               |
|   | lefty                            | ventral ectoderm (from early blastula to G)                                                                                                                                                 | Gain of function | tubulin              | ciliary band (LG and Pr). A weaker expression is present at the dorsal ectoderm apex                                                                                                        | inhibition                             | lefty -> tubulin                            | Unknown              | Lefty is Nodal antagonist : Lefty overexpression leads to Nodal signaling inhibition                 | Duboc et al, 2008               |
|   | lefty                            | ventral ectoderm (from early blastula to G)                                                                                                                                                 | Gain of function | tbx2/3               | Dorsal ectoderm (LB->G)                                                                                                                                                                     | inhibition                             | lefty -> tbx2/3                             | Unknown              | Lefty is Nodal antagonist : Lefty overexpression leads to Nodal signaling inhibition                 | Duboc et al, 2008               |
|   | lefty                            | ventral ectoderm (from early blastula to G)                                                                                                                                                 | Gain of function | 29D                  | dorsal ectoderm (Pr)                                                                                                                                                                        | inhibition                             | lefty -> 29D                                | Unknown              | Lefty is Nodal antagonist : Lefty overexpression leads to Nodal signaling inhibition                 | Duboc et al, 2008               |
|   | lefty                            | ventral ectoderm (from early blastula to G)                                                                                                                                                 | Loss of function | brachyury            | ventral ectoderm, then stomodeum                                                                                                                                                            | inhibition                             | lefty -> brachyury                          | Unknown              | Lefty is Nodal antagonist : in Lefty morphants, Nodal is ectopically expressed in the whole ectoderm | Duboc et al, 2008               |
|   | lefty                            | ventral ectoderm (from early blastula to G)                                                                                                                                                 | Loss of function | tbx2/3               | Dorsal ectoderm (LB->G)                                                                                                                                                                     | inhibition                             | lefty -> tbx2/3                             | Unknown              | Lefty is Nodal antagonist : in Lefty morphants, Nodal is ectopically expressed in the whole ectoderm | Duboc et al, 2008               |
|   | lefty                            | ventral ectoderm (from early blastula to G)                                                                                                                                                 | Loss of function | nodal                | Ventral ectoderm (64C->G)                                                                                                                                                                   | inhibition                             | lefty -> nodal                              | Unknown              | Lefty is Nodal antagonist : in Lefty morphants, Nodal is ectopically expressed in the whole ectoderm | Duboc et al, 2008               |
|   | lefty                            | ventral ectoderm (from early blastula to G)                                                                                                                                                 | Loss of function | lefty                | ventral ectoderm (from early blastula to G)                                                                                                                                                 | inhibition                             | lefty -> lefty                              | Unknown              | Lefty is Nodal antagonist : in Lefty morphants, Nodal is ectopically expressed in the whole ectoderm | Duboc et al, 2008               |
|   | lefty                            | ventral ectoderm (from early blastula to G)                                                                                                                                                 | Loss of function | 29D                  | dorsal ectoderm (Pr)                                                                                                                                                                        | inhibition                             | lefty -> 29D                                | Unknown              | Lefty is Nodal antagonist : in Lefty morphants, Nodal is ectopically expressed in the whole ectoderm | Duboc et al, 2008               |
|   | Bmp2/4                           | ventral ectoderm (EB->G)                                                                                                                                                                    | Loss of function | goosecoid            | ventral ectoderm (B, MB), then in a ring around the stomodeum (G)                                                                                                                           | Independent                            | N/A                                         | N/A                  |                                                                                                      | Lapraz et al, 2009              |
|   | Bmp2/4                           | ventral ectoderm (EB->G)                                                                                                                                                                    | Loss of function | glypican5            | Dorsal ectoderm (MB, G, Pr)                                                                                                                                                                 | Activation                             | Bmp2/4 -> glypican5                         | Unknown              |                                                                                                      | Lapraz et al, 2009              |
|   | Bmp2/4                           | ventral ectoderm (EB->G)                                                                                                                                                                    | Loss of function | onecut               | Whole ectoderm early (blastula), then restricted to the ciliary band (late MB -> Pr)                                                                                                        | inhibition                             | Bmp2/4 -> onecut                            | Unknown              |                                                                                                      | Lapraz et al, 2009              |
|   | Bmp2/4                           | ventral ectoderm (EB->G)                                                                                                                                                                    | Loss of function | delta                | Neuron precursor (Pr)                                                                                                                                                                       | Inhibition                             | Bmp2/4 -> delta                             | Unknown              |                                                                                                      | Lapraz et al, 2009              |
|   | Alk3/6 (BMP type I receptor)     | Ubiquitous                                                                                                                                                                                  | Loss of function | goosecoid            | ventral ectoderm (B, MB), then in a ring around the stomodeum (G)                                                                                                                           | Independent                            | N/A                                         | N/A                  |                                                                                                      | Lapraz et al, 2009              |
|   | Alk3/6 (BMP type I receptor)     | Ubiquitous                                                                                                                                                                                  | Loss of function | delta                | Neuron precursor (Pr)                                                                                                                                                                       | Inhibition                             | Alk3/6 (BMP type I receptor) -> wnt8        | Unknown              |                                                                                                      | Lapraz et al, 2009              |
|   | Bmp2/4                           | ventral ectoderm (EB->G)                                                                                                                                                                    | Gain of function | glypican5            | Dorsal ectoderm (MB, G, Pr)                                                                                                                                                                 | Activation                             | Bmp2/4 -> glypican5                         | Unknown              |                                                                                                      | Lapraz et al, 2009              |
|   | Alk4/5/7 (Nodal type I receptor) | Ubiquitous                                                                                                                                                                                  | Gain of function | chordin              | ventral ectoderm (SB->G)                                                                                                                                                                    | Activation                             | Alk4/5/7 (Nodal type I receptor) -> chordin | Yes                  | see inductive assay in presence of translational inhibitor                                           | Lapraz et al, 2009              |
|   | Nodal                            | Ventral ectoderm (64C->G)                                                                                                                                                                   | Loss of function | nodal                | Ventral ectoderm (64C->G)                                                                                                                                                                   | Activation                             | Nodal -> nodal                              | Yes                  | supported by promoter analysis and inductive assay with translational inhibitor                      | Range and Lapraz et al, 2007    |
|   | Alk4/5/7 (Nodal type I receptor) | Ubiquitous                                                                                                                                                                                  | Loss of function | nodal                | Ventral ectoderm (64C->G)                                                                                                                                                                   | Activation                             | Alk4/5/7 (Nodal type I receptor) -> nodal   | Yes                  | supported by promoter analysis and inductive assay with translational inhibitor                      | Range and Lapraz et al, 2007    |
|   | Alk4/5/7 (Nodal type I receptor) | Ubiquitous                                                                                                                                                                                  | Loss of function | univin               | Whole ectoderm early, then inhibited dorsally (MB) before being restricted to the lateral part of the ciliary band (G, Pr). At G stage, a weak expression persists in the ventral ectoderm. | Independent                            | N/A                                         | N/A                  |                                                                                                      | Range and Lapraz et al, 2007    |
|   | Univin                           | Whole ectoderm early, then inhibited dorsally (MB) before being restricted to the lateral part of the ciliary band (G, Pr). At G stage, a weak expression persists in the ventral ectoderm. | Gain of function | nodal                | Ventral ectoderm (64C->G)                                                                                                                                                                   | Activation                             | Univin -> nodal                             | Unknown              |                                                                                                      | Range and Lapraz et al, 2007    |

| B | Perturbed gene INPUT | Spatial domain (*) INPUT                                                                              | ASSAY            | Analyzed gene OUTPUT | Spatial domain (*) OUTPUT       | Interaction deduced from previous work | Summary          | Direct interaction ? | Comment | Reference ( <i>P. lividus</i> ) |
|---|----------------------|-------------------------------------------------------------------------------------------------------|------------------|----------------------|---------------------------------|----------------------------------------|------------------|----------------------|---------|---------------------------------|
|   |                      |                                                                                                       |                  |                      |                                 |                                        |                  |                      |         |                                 |
|   | SoxB1                | Whole ectoderm                                                                                        | Loss of function | nodal                | Ventral ectoderm (64C->G)       | Activation                             | SoxB1 -> nodal   | Unknown              |         | Range and Lapraz et al, 2007    |
|   | FGFA                 | Whole ectoderm early, then inhibited dorsally before being restricted to the ciliary band (MB, G, Pr) | Loss of function | pax2/5/8             | Ciliary band (vegetal part) (G) | Activation                             | FGFA -> pax2/5/8 | Unknown              |         | Röttinger et al, 2008           |
|   | FGFA                 | Whole ectoderm early, then inhibited dorsally before being restricted to the ciliary band (MB, G, Pr) | Loss of function | sprouty              | Ciliary band (lateral part)     | Activation                             | FGFA -> sprouty  | Unknown              |         | Röttinger et al, 2008           |

(\*) with respect to the ectoderm territories only, some genes are expressed in different germ layers and this will not be listed here
